1 **A role of the Nse4 kleisin and Nse1/Nse3 KITE subunits in the ATPase cycle of SMC5/6**

2 Vondrova L.<sup>1</sup>, Adamus M.<sup>2</sup>, Nociar M.<sup>1</sup>, Kolesar P.<sup>1</sup>, Oliver A.W.<sup>3</sup>, Palecek J.J.<sup>1,2</sup>

3 <sup>1</sup> National Centre for Biomolecular Research, Faculty of Science, Masaryk University,  
4 Kotlarska 2, 61137 Brno, Czech Republic

5 <sup>2</sup> Mendel Centre for Plant Genomics and Proteomics, Central European Institute of  
6 Technology, Masaryk University, Kamenice 5, 62500 Brno, Czech Republic

7 <sup>3</sup> Genome Damage and Stability Centre, School of Life Sciences, University of Sussex,  
8 Falmer, Brighton BN1 9RQ, United Kingdom

9

10 Corresponding address: [jpalecek@sci.muni.cz](mailto:jpalecek@sci.muni.cz); Tel.: +420-54949-6128

11

12 **Keywords:** SMC5/6 complex; Nse4 kleisin linker; Nse1/Nse3 KITE subunits; ATP binding;  
13 protein-protein interaction, fission yeast

14

15 **ABSTRACT**

16           The SMC (Structural Maintenance of Chromosomes) complexes are composed of  
17 SMC dimers, kleisin and kleisin-interacting subunits. Mutual interactions of these subunits  
18 constitute the basal architecture of the SMC complexes. Particularly, terminal domains of the  
19 kleisin subunit bridge the SMC head domains of the SMC molecules. Binding of ATP  
20 molecules to the heads and their hydrolysis alter the shape of long SMC molecules (from rod-  
21 like to open-ring shapes) and power them with motor activity. The kleisin-interacting (HAWK  
22 or KITE) subunits bind kleisin linker regions and regulate such dynamic activities.

23           We developed new systems to follow the interactions between SMC5/6 subunits and  
24 stability of the SMC5/6 complexes. First, we show that the N-terminal domain of the Nse4  
25 kleisin molecule binds to the SMC6 neck and bridges it to the SMC5 head. Second, binding of  
26 the Nse1 and Nse3 KITE proteins to the Nse4 linker part increases stability of the ATP-free  
27 SMC5/6 complex. In contrast, binding of ATP to the SMC5/6 complex containing KITE  
28 subunits significantly decreases its stability. Elongation of the Nse4 linker partially suppresses  
29 instability of the ATP-bound complex, suggesting that the binding of the KITE proteins to the  
30 Nse4 linker constrains its limited size. Our data suggest that the KITE proteins may shape the  
31 Nse4 linker to fit the ATP-free complex optimally and to facilitate opening of the complex  
32 upon ATP binding. This mechanism suggests an important role of the KITE subunits in the  
33 dynamics of the SMC5/6 complexes.

34

35 **AUTHOR SUMMARY**

36           The SMC5/6 complex is member of the Structural maintenance of chromosomes  
37 (SMC) family, key organizers of both prokaryotic and eukaryotic genomes. Their architecture  
38 and dynamics (driven by ATP binding and hydrolysis) are essential for cellular processes, like

39 chromatin segregation, condensation, replication and repair. In this paper, we described  
40 conserved mode of the Nse4 kleisin subunit binding to the SMC6 (similar to cohesin and  
41 condensin) and its bridging role. Furthermore, we showed different impact of the binding of  
42 the Nse1-Nse3 KITE subunits to the Nse4 kleisin bridge. Our study suggested that the KITE  
43 proteins modulate the stability of the SMC5/6 complex, depending on its binding and  
44 hydrolysis of ATP. Our findings uncover molecular mechanisms underlying dynamics of the  
45 SMC5/6 complexes.

46

## 47 **INTRODUCTION**

48 The SMC (Structural Maintenance of Chromosomes) complexes are key organizers of  
49 prokaryotic and eukaryotic genomes. They organize chromatin domains (cohesins; [1]),  
50 condense mitotic chromosomes (condensins; [2]), assist in DNA repair (SMC5/6; [3, 4]) and  
51 replication (SMC/ScpAB; [5]). These circular complexes use the energy of ATP hydrolysis to  
52 drive DNA topology changes. In prokaryotes, SMC/ScpAB drives extrusion of loops forming  
53 behind the replication fork. In eukaryotes, condensins extrude loops laterally and axially to  
54 shape chromatin to the typical mitotic chromosomes. Cohesins assist in formation of  
55 topologically associating domains during interphase. Cohesin rings can also hold newly  
56 replicated sister chromatids together and release them in highly controlled manner. The  
57 SMC5/6 complexes have been implicated in the repair of DNA damage by homologous  
58 recombination, stabilization and restart of stressed replication forks. The SMC5/6 instability  
59 leads to the chromosome breakage syndrome in human [6], however, the molecular  
60 mechanism of the SMC5/6 action is largely unclear.

61 All the SMC complexes are composed of three common categories of subunits: SMC,  
62 kleisin and kleisin-interacting proteins [7, 8]. The SMC proteins are primarily build of long  
63 anti-parallel coiled-coil arms, a globular hinge (situated in the middle of their peptide chain)

64 and a head domain (formed by combined amino and carboxyl termini; [9-13]). The globular  
65 head domain contains ATP binding and hydrolysis motifs of the ATP-binding cassette  
66 transporter family [14, 15]. Two SMC molecules form dimers via the association of their  
67 hinge domains and transiently interact when their head domains sandwich a pair of ATP  
68 molecules. The binding of ATP changes conformation and shape of the SMC subunits at local  
69 as well as global levels [10]. At local level, the SMC heads and necks move from aligned  
70 position to the ATP-locked conformation. At global level, the overall shape of the complex  
71 changes from rod- to ring-like upon ATP binding (with heads locked by ATP at one end and  
72 hinge dimer at the other end). The hydrolysis of ATP dissolves the SMC-ATP-SMC head  
73 bridge.

74 The ATPase head domains are also connected by the kleisin subunit in an asymmetric  
75 way. Kleisin binds to the cap side of one SMC (designated as  $\kappa$ SMC) head domain via a  
76 winged-helix domain (WHD) at its carboxyl terminus. Kleisin's  $\alpha$ -helix located at its amino  
77 terminal helix-turn-helix (HTH) domain binds to the coiled-coil base region immediately  
78 adjacent to the other SMC head (called neck and designated as  $\nu$ SMC; [16-18]). This kleisin  
79 bridge mediated by protein-protein interactions seems to be more permanent than the ATP-  
80 mediated bridge (as the latter bridge dissolves upon ATP hydrolysis). However, the ATP  
81 binding may induce dissociation of the kleisin- $\nu$ SMC interaction and lead to release of DNA  
82 from cohesin ring [19-24].

83 The kleisin-interacting subunits bind and shape kleisin linker regions connecting N-  
84 (HTH) and C-terminal (WHD) domains. The KITE (Kleisin-Interacting Tandem winged-helix  
85 Element) subunits interact with kleisins in prokaryotic SMC/ScpAB and eukaryotic SMC5/6  
86 complexes, while eukaryotic cohesin and condensin complexes associate with HAWK (HEAT  
87 proteins Associated With Kleisin) proteins. Interestingly, HAWK (Scc3 and Pds5) and Wapl  
88 proteins regulate release of cohesin from chromosomes. It was proposed that these proteins

89 shape and stiffen the linker region of kleisin molecule, which assists in transduction of  
90 conformational changes of the ATP-mediated SMC head dimerization to the dissociation of  
91 the kleisin-vSMC interaction (Scc1-Smc3 in the cohesin complex). Similarly, KITE proteins  
92 assist in opening of the SMC/ScpAB complex [25, 26]. However, the role of the KITE  
93 subunits in the SMC5/6 complex remains largely elusive.

94 Here we aimed to uncover relationships between SMC5/6 subunits and their roles in  
95 the SMC5/6 dynamics. We developed new systems to analyse the interactions between  
96 SMC5/6 subunits and to follow the stability of SMC5/6 complexes. Using systems composed  
97 of SMC6-Nse4-Nse3-Nse1 and SMC6-Nse4-SMC5, respectively, we showed that the N-  
98 terminal HTH domain of the Nse4 kleisin molecule binds to the SMC6 neck and bridges it  
99 with the SMC5 head. With a more complex system, we observed increased stability of the  
100 ATP-free SMC5/6 complex upon binding of the Nse1 and Nse3 KITE proteins to the Nse4  
101 kleisin. While the ATP-free complex was highly stable, the binding of ATP to the SMC5/6  
102 complex containing KITE-bound kleisin significantly decreased its stability. Reduced Nse3  
103 binding to the Nse4 linker or elongation of the Nse4 linker partially suppressed the instability  
104 of the ATP-bound complex, suggesting that the binding of the KITE proteins to the Nse4  
105 linker constrains its limited size. Our data suggest that the KITE proteins may shape the Nse4  
106 linker to fit the ATP-free complex optimally and to facilitate opening of the complex upon  
107 ATP binding.

108

## 109 **RESULTS**

### 110 **Nse4 interacts with SMC6 neck**

111 We have previously shown that Nse4 belongs to the kleisin superfamily of proteins  
112 and binds to SMC5 and SMC6 head fragments [27]. To map Nse4 interactions with SMC6,

113 we employed peptide libraries covering yeast *S. pombe* SMC6 regions aa 241-365 and aa875-  
114 1024 (Suppl. Fig. S1A and Supplementary Table 1; unpublished data). The peptides were pre-  
115 bound to ELISA plates and tested against Nse4(1-150) and control (human TRF2) protein [28,  
116 29]. The peptides covering the C-terminal region of SMC6 (aa955-1009) bound to Nse4 (Figs.  
117 1A and S1A). The peptide aa960-984 exhibited the highest affinity and specificity to Nse4  
118 while other peptides bound to Nse4 in a less specific way (e.g. peptide aa970-994).  
119 Interestingly, the SMC6 region aa960-984 corresponds to the SMC neck regions interacting  
120 with kleisins in most SMC complexes [12].

121 To analyse the Nse4-SMC6 interaction in more detail, we established various  
122 multicomponent yeast two-hybrid (mY2H) systems [30]. It was difficult to follow the Nse4-  
123 SMC6 binary interaction in classical Y2H (Fig. 1B, column 3; [27, 31, 32]), therefore we  
124 added DNA encoding Nse1 and Nse3 subunits on an extra plasmid (p416ADH1-Nse1+Nse3  
125 construct, 4Y2H) to enhance Nse4-binding properties [33]. Indeed, addition of both Nse1 and  
126 Nse3 subunits to Gal4BD-Nse4/Gal4AD-SMC6 resulted in a stable SMC6-Nse4-Nse3-Nse1  
127 complex (Fig. 1B, column 4). Similarly, addition of SMC5 to Nse4-SMC6 (3Y2H) resulted in  
128 formation of a stable SMC5-Nse4-SMC6 complex (Fig. 1C, column 4).

129 Using these mY2H systems and site-directed mutagenesis, we aimed to identify the  
130 Nse4-binding residues within the most conserved part of the ELISA-defined SMC6 region  
131 (aa960-984; Figs. 1A and S1B; unpublished data). The L964A, L965A, L968A, E969A,  
132 L972A and R975A mutations reduced stability of the SMC6-Nse4-Nse3-Nse1 tetramer while  
133 the others had negligible effect (Figs. 1B and S1C). These data suggest that residues L964,  
134 L965, L968, E969, L972 and R975 may mediate either the Nse4-SMC6 interaction or putative  
135 interactions between SMC6 and Nse1-Nse3 subunits. To exclude the latter possibility, we  
136 employed 3Y2H system consisting of the SMC5/SMC6/Nse4 subunits. Again, L964A,  
137 L965A, L968A, E969A, L972A and R975A mutations reduced stability of the (SMC5-

138 )SMC6-Nse4 complex while the others had no effect (Figs. 1C and S1D), suggesting that  
139 these residues may mediate Nse4-SMC6 interaction.

140 To distinguish between mutations specifically disturbing the Nse4-SMC6 interaction  
141 from those affecting SMC6 structure, we established another 3Y2H system consisting of  
142 SMC6 and Nse5-Nse6 subunits (as Nse5 and Nse6 bind to the SMC6 protein; [27]). In this  
143 system, we used the same Gal4AD-SMC6 mutation constructs as above in combination with  
144 Gal4BD-Nse5 and p416ADH1-Nse6 (Figs. 1D and S1E). The mutations L964A, L968A and  
145 E969A reduced SMC6-Nse5-Nse6 complex stability, suggesting their deleterious effect on  
146 SMC6 structure (Fig. 1, compare panels B, C and D, columns 5, 7 and 8). In contrast, the  
147 other mutations had no impact, suggesting that the conserved L965, L972 and R975 residues  
148 within the SMC6 neck region mediate SMC6-Nse4 interaction (Figs. 1 and S1).

149

#### 150 **SMC6 binds N-terminal motif of Nse4 protein**

151 Next, we took advantage of the crystal structures of the kleisin-vSMC complexes [16-  
152 18, 26, 34], which suggest a key role for the N-terminal HTH domain of the kleisin molecule  
153 in its binding to vSMC neck. We mutated residues within the third  $\alpha$ -helix of the Nse4 HTH  
154 domain (aa62-68) and analysed their impact on the Nse4-SMC6 interaction using the SMC5-  
155 Nse4-SMC6 3Y2H system as above (Fig. 1C). The Nse4 mutations L62C, K64C, T65R,  
156 D67C and L68C reduced the SMC5-Nse4-SMC6 stability significantly while the others had  
157 no effect (Fig. 2A). To distinguish between mutations specifically disturbing Nse4-SMC6  
158 interactions and mutations affecting Nse4 structure, we tested the Gal4BD-Nse4 mutation  
159 constructs in combination with Gal4AD-Nse3 in the classical Y2H system (Fig. 2B; [28, 35]).  
160 The K64C and D67C mutations affected the Nse3-Nse4 interaction, suggesting their  
161 deleterious effect on the Nse4 structure (Fig. 2B, columns 6 and 9). In contrast, the other

162 mutations had no effect on the Nse3-Nse4 interaction, suggesting that the intact L62, T65 and  
163 L68 conserved residues are required for the Nse4-SMC6 binding (Fig. 2C). Altogether, our  
164 data suggest that the Nse4 HTH motif binds the SMC6 neck region and that the SMC6-Nse4  
165 interaction mode is similar to the other vSMC-kleisin interactions [12, 13].

166 To analyse the role of the Nse4-SMC6 interaction in yeast cells, we introduced the  
167 L62C and T65R mutations into the genome of diploid *S. pombe*. Tetrad analysis showed that  
168 the single *nse4-T65R* and double *nse4-L62C, T65R* mutations were lethal (Fig. 2D),  
169 suggesting an essential role for the Nse4-SMC6 interaction.

170

### 171 **A role for the Nse4 and ATP molecules in bridging of SMC5-SMC6**

172 To compare the role of Nse4 and ATP in bridging of the SMC5-SMC6 heads, we  
173 introduced the SMC5/E995Q mutation which inhibits ATP hydrolysis; i.e. enhances ATP  
174 retention between SMC5-SMC6 heads and their dimerization (Figs. 3A and S2; [14, 36]). In  
175 the 3Y2H system, the interaction between Gal4BD-SMC5 and Gal4AD-SMC6 constructs was  
176 not detectable, suggesting a low stability of the SMC5-SMC6 dimer even upon stable binding  
177 of ATP (Fig. 3A, columns 1 and 2). Addition of Nse4 resulted in stable SMC5-Nse4-SMC6  
178 complex formation (Fig. 3A, columns 3 and 4), suggesting that Nse4 stabilizes the bridge  
179 between SMC5 and SMC6. The introduction of the ATP-hydrolysis mutation to the SMC5-  
180 Nse4-SMC6 complex only slightly increased its stability (Fig. 3A), suggesting a major role of  
181 Nse4 (and a minor additive effect of ATP binding; see below) in bridging of the SMC5-SMC6  
182 heads.

183 When we reduced the Nse4 binding affinity to SMC6 using the specific Nse4  
184 mutations described above, the stability of the wild-type SMC5 complexes dropped more  
185 dramatically than the stability of the SMC5/E995Q mutant complexes (Fig. 3A, compare odd  
186 and even columns). For example, the L68C mutation reduced stability of the wild-type



187 SMC5-Nse4-SMC6 complex significantly while the ATP molecule (in SMC5/E995Q)  
188 stabilized the Nse4/L68C complex (Fig. 3A, columns 5 and 6). Further reduction of the Nse4  
189 binding affinity (Fig. 3A, columns 7-12) led to further drops in stability of SMC5-Nse4-  
190 SMC6, again, with more stable hydrolytic mutants. Although the stability of the Nse4/L62C,  
191 T65R double mutant complex was very low, the residual affinity of Nse4 to SMC6 still  
192 supported ATP binding in the SMC5/E995Q mutant (Fig. 3A, columns 11 and 12). These data  
193 suggest that ATP contributes significantly to the SMC5-SMC6 bridging when the Nse4  
194 affinity is reduced and that the Nse4 and ATP interactions are synergistic in the SMC5-Nse4-  
195 SMC6 complex.

196

#### 197 **KITE-bound Nse4 is constrained upon ATP binding**

198 To analyse the role of ATP binding to SMC5-SMC6 within the complex stabilized by  
199 KITE proteins, we added Nse1 and Nse3 to the p416ADH1-Nse4 plasmid (p416ADH1-  
200 Nse4+Nse3+Nse1 construct, 5Y2H; Fig. 3B; [30, 37]). Consistent with their Nse4-stabilizing  
201 roles (Fig. 1B), the KITE proteins increased the stability of the SMC5-Nse4-SMC6 complex  
202 significantly (Fig. 3B, compare columns 1 and 3). Surprisingly, addition of the SMC5/E995Q  
203 ATP-hydrolysis mutation greatly destabilized the SMC5-SMC6-Nse4-Nse3-Nse1 complex  
204 (Fig. 3B, compare columns 3 and 4), suggesting antagonistic roles of ATP and KITE subunits.

205 To ensure that the instability of the ATP-bound SMC5-SMC6-Nse4-Nse3-Nse1  
206 complex is specifically caused by the ATP-mediated SMC5-SMC6 head bridge, we  
207 introduced either SMC6/S1045R mutation disturbing the ATP-mediated SMC5-SMC6  
208 dimerization interface or SMC5/K57I mutation abolishing binding of ATP (Suppl. Fig. S2;  
209 [14, 36, 38]). As the SMC6/S1045R mutation suppressed instability caused by the  
210 SMC5/E995Q mutation (Suppl. Fig. S2, column 10), we can exclude a direct impact of this

211 mutation on SMC5 (e.g. on SMC5-Nse4 interaction). The observation that both mutations  
212 suppressed instability caused by the SMC5/E995Q mutation (Suppl. Fig. S2, column 10 and  
213 12) confirm the notion that ATP-mediated SMC5-SMC6 head dimerization causes SMC5-  
214 SMC6-Nse4-Nse3-Nse1 instability.

215         Given that both ATP and Nse4 bridge SMC5-SMC6 heads, our data suggest that ATP  
216 constrains KITE-bound Nse4 bridge (and vice versa; Fig. 3B, compare columns 2 and 4).  
217 Therefore, we reduced Nse4 binding affinity to SMC6 (to release the constraint) using the  
218 specific Nse4 mutations described above (Figs. 2 and 3A). With decreasing Nse4 affinity, the  
219 stability of the ATP-free complexes gradually dropped to its limit (Fig. 3B, columns 5, 7, 9  
220 and 11), suggesting that only Nse4 brought SMC5-SMC6 together. In contrast, the stability of  
221 the ATP-bound SMC5-SMC6-Nse4-Nse3-Nse1 complexes dropped first (columns 6, 8, and  
222 10) and then it partially recovered in the L62C, T65R double mutant (column 12). In the  
223 single mutants, the reduced Nse4 binding affinity (balance between the Nse4 binding and  
224 competing binding of ATP) resulted in decreased stability of these complexes. In the double  
225 mutant, residual Nse4 binding was too weak to compete the ATP binding and therefore ATP  
226 became the major bridge (manifested as increased stability of the SMC5-SMC6-Nse4-Nse3-  
227 Nse1 complex). These data suggest that ATP constrains KITE-bound Nse4 bridge (and vice  
228 versa; i.e. the stability of the KITE-containing SMC5/6 complexes depends on the balance  
229 between the Nse4 binding and competing binding of ATP).

230

### 231         **The ATP-mediated constraint depends on the KITE subunits**

232         In the SMC5/6 complex, KITE and kleisin subunits form a tight Nse1-Nse3-Nse4 sub-  
233 complex mediated by their mutual interactions (Fig. 4A; [27, 35]). As ATP destabilized the  
234 Nse4 bridge only in the presence of the KITE subunits (Fig. 3), we introduced mutations

235 specifically affecting stability of the Nse1-Nse3-Nse4 trimer to evaluate a role of the KITE  
236 proteins. Specific mutations disturbing only individual Nse1-Nse3 (Nse1/Q18A, M21A) and  
237 Nse3-Nse4 (Nse4/del87-91) binary interactions (Fig. 4A, compare columns 3 against 4 and 9  
238 against 10) did not affect the stability of the whole Nse1-Nse3-Nse4 trimer (Fig. 4A, columns  
239 6 and 7), but their combination compromised trimer assembly (Fig. 4A, column 8). When we  
240 introduced this combination of Nse1 and Nse4 mutations to the SMC5-SMC6-Nse4-Nse3-  
241 Nse1 complex, its stability was reduced as the KITE proteins lost their ability to bind and  
242 stabilize Nse4 (Fig. 4B, compare columns 6 and 8). In contrast, when we introduced this  
243 combination of Nse1 and Nse4 mutations to the SMC5/E995Q hydrolytic mutant complex,  
244 the stability of the ATP-bound complex was increased (Fig. 4B, compare columns 7 and 9),  
245 suggesting that the ATP-induced constraint of Nse4 depends on its binding to the KITE  
246 subunits. Importantly, there was no difference between the stability of the ATP-free and ATP-  
247 bound complexes (compare columns 8 and 9), further corroborating our conclusion that the  
248 ATP-mediated constraint depends on the binding of KITE dimer to Nse4. Furthermore, the  
249 Nse4/del87-91 mutation compromising only Nse3-Nse4 interaction (Figs. 4A, columns 4 and  
250 6) had a suppressing effect on SMC5/E995Q complex similar to the double mutant (Fig. 4B,  
251 compare columns 9 and 11), suggesting that the binding of Nse3 to the Nse4 linker partially  
252 constrained it. Our data suggest that the instability of the SMC5/6 complex induced by ATP  
253 binding is dependent on the binding of KITE proteins to the Nse4 kleisin linker.

254

### 255 **The limited size of the Nse4 linker poses mechanical constraint**

256 The KITE dimers bind linker regions of kleisin molecules in SMC complexes [7, 16,  
257 28, 39-41]. To explore the role of the Nse4 linker in propagation of the ATP-induced  
258 constraint, we inserted a 30 amino acid extension at the putative end of the linker (Fig. 4C;  
259 [27]) to lengthen the linker. The Nse4 extended construct bound Nse1-Nse3 KITE proteins

260 normally (Fig. 4D) and formed the SMC5-SMC6-Nse4-Nse3-Nse1 complex with the stability  
261 similar to that with the normal Nse4 construct (Fig. 4E, columns 3 and 4). Interestingly,  
262 combination of the Nse4 extended construct with the SMC5/E995Q ATP-hydrolysis mutant  
263 increased the stability of the SMC5-SMC6-Nse4-Nse3-Nse1 complex, suggesting that the  
264 extended Nse4 linker partially alleviated ATP-induced constraint (Fig. 4E, columns 5 and 6).

265 Taken together, we propose a model in which the KITE proteins shape the kleisin  
266 linker connecting SMC heads. The KITE-shaped Nse4 linker fits the ATP-free conformation  
267 of SMC5/6 (and therefore increases its stability), while the ATP-bound conformation is not  
268 compatible with the KITE-shaped Nse4 linker (and therefore constrains the Nse4 bridge; Fig.  
269 5). This model suggests a key role of the kleisin and KITE subunits in molecular mechanisms  
270 driving the SMC5/6 dynamics.

271

## 272 **DISCUSSION**

273 The kleisin subunits bridge the SMC heads in an asymmetric way and lock the SMC  
274 ring at its head side [12, 13]. We have shown that Nse4 belongs to the kleisin superfamily of  
275 proteins and binds strongly to  $\kappa$ SMC5 head via its Nse4 C-terminal WHD [27]. However, we  
276 observed only weak binding of Nse4 to  $\nu$ SMC6 [27] and other studies actually failed to show  
277 the Nse4-SMC6 interaction [31, 32, 42]. Here we developed several systems to prove and  
278 analyse the interaction between Nse4 and SMC6. We mapped the Nse4-SMC6 interface in  
279 detail and found that the Nse4-SMC6 interaction mode is similar to the other  $\nu$ SMC-kleisin  
280 interactions [16-18, 26, 34]. Therefore, we assume that Nse4 bridges SMC5-SMC6 proteins in  
281 a way similar to kleisins in the other SMC complexes, except that the Nse4 bridge is  
282 specifically modulated by the Nse1-Nse3 KITE subunits in the SMC5/6 complex (see below).

283           The kleisins lock the SMC rings that can embrace DNA or extrude a loop in an ATP-  
284 dependent way [43]. To release such entrapped DNA (or extrude the loop), the SMC-SMC or  
285 SMC-kleisin interface must be open. It was proposed that the vSMC-kleisin interface opens  
286 and serves as an exit gate for trapped DNA [19, 44, 45]. In the cohesin complex, the Scc1-  
287 SMC3 interface is opened upon ATP binding (in the presence of the Pds5 and Wapl  
288 regulators; [19-24]). Our data show that the SMC5/6 complex is unstable in the ATP-bound  
289 state, suggesting that one or more interfaces are compromised upon ATP binding (Fig. 3B).  
290 Given the weak nature of the Nse4-SMC6 interaction, we assume that this interaction is prone  
291 to dissociation and that the Nse4-SMC6 interface is opened upon ATP binding. Consistent  
292 with the latter notion, the ATP-mediated constraint was released when the Nse4-SMC6  
293 interaction was disturbed (Fig. 3B). Therefore, we hypothesize that the binding of ATP to the  
294 SMC5-SMC6 heads constrains the Nse4 bridge (when bound by the Nse1 and Nse3 KITE  
295 subunits; see below and Fig. 5) and this constraint is released via dissociation of the Nse4-  
296 SMC6 interaction (Fig. 3B).

297           The ATP binding induces changes in the mutual positions (and conformations) of the  
298 SMC heads and arms [10, 26, 46-48]. Consequently, the shape of the whole SMC complex  
299 changes from a rod-like conformation (with juxtaposed arms stabilized by their mutual  
300 interactions) to the less stable open ring (Fig. 5). At least part of the ATP-induced SMC5/6  
301 instability (Fig. 3B) might be a consequence of the shape transition from rod to ring (our  
302 electron microscopy data suggest that the human SMC5/6 complex can adopt both shapes; M.  
303 Adamus, unpublished data). However, we observed this instability only in the presence of the  
304 KITE subunits, suggesting that either our system is unable to detect the SMC5-SMC6 rod-to-  
305 ring shape transition (and monitors only Nse4 bridge opening) or the KITE proteins are  
306 required for the full rod-to-ring shape transition. The latter possibility is consistent with the  
307 prokaryotic SMC/ScpAB data which suggest an important function of the KITE subunits in

308 pulling SMC arms [25, 26]. In our model, the binding of ATP to the SMC5-SMC6 heads pulls  
309 their arms apart and constrains the KITE-bound Nse4 bridge (Fig. 5).

310 It was shown that kleisin-interacting proteins (particularly KITE and HAWK subunits)  
311 bind and shape linker regions of the kleisin molecules [7, 11, 16, 28, 39-41, 49-51]. Our data  
312 showed that the binding of the Nse1-Nse3 KITE dimer increases the Nse4 ability to bind  
313 SMC5-SMC6 subunits in ATP-free state (Figs. 1B and 3B), suggesting that the KITE binding  
314 may shape Nse4 to fit the ATP-free conformation of the SMC5/6 complex. In contrast, the  
315 KITE-bound Nse4 linker is barely compatible with the ATP-bound conformation of SMC5/6.  
316 Consistent with these notions, 30 amino acid long extension of the Nse4 linker partially  
317 relaxed its stiff shape and resulted in a mild drop in the stability of the ATP-free complex  
318 (Fig. 4E). In contrary, this extension partially released the ATP-induced constraint in the  
319 ATP-bound complex. Further extension of the Nse4 linker decreased the stability of the ATP-  
320 free complex further (as the linker became more flexible) to the levels similar to the ATP-  
321 bound complex (90 amino acid extension fully released ATP-induced constraint; L.  
322 Vondrova, unpublished data). Therefore, we suggest that KITE subunits shape the Nse4 linker  
323 to fit the ATP-free complex optimally and to facilitate opening of the complex upon ATP  
324 binding (Fig. 5). Consistent with this conclusion, the ATP-mediated constraint was partially  
325 suppressed upon release of the part of the Nse4 linker from the Nse3 WHB pocket (Fig. 4B;  
326 [28, 35]). Altogether, we hypothesize that the Nse4 linker is stiffened upon its KITE binding  
327 and transduces a pulling force generated by the binding of ATP to the SMC5-SMC6 heads  
328 (Fig. 5B). In consequence, the Nse4-SMC6 interface opens and releases the Nse4 constraint.  
329 After ATP hydrolysis, the SMC5-ATP-SMC6 head dimer is dissolved and Nse4 is reattached  
330 to the SMC6 neck.

331 Similarly, it was proposed that binding of the HAWK (Scc3 and Pds5) and Wapl  
332 proteins to Scc1 kleisin stiffens its linker region and transduces conformational energy of the

333 ATP-dependent SMC head dimerization to the dissociation of Scc1 from Smc3 [19, 45]. In  
334 the absence of the Pds5-Wapl regulators, the cohesin's head movements driven by ATP  
335 binding and hydrolysis cannot be effectively coupled to exit gate opening as the Scc1 linker is  
336 flexible. Interestingly, the size of the Scc1 linker is much longer (cca 400 amino acids) than  
337 the size of the Nse4 linker (and ScpA linker; both having cca 100 amino acids; J. Palecek,  
338 unpublished data). Accordingly, the Scc3 HAWK subunit covers only a small part of the Scc1  
339 linker and requires Pds5-Wapl regulators to shape the long Scc1 linker while the KITE  
340 subunits are sufficient to shape their short kleisin partners. As mentioned above, the extension  
341 of the Nse4 linker region suppressed the ATP-induced constraint, suggesting that the short  
342 size of the Nse4 linker is critical for the dynamics of the SMC5/6 complex. Consistent with  
343 this notion, the integration of the 30 amino acid long extension to the genomic copy of the  
344 fission yeast Nse4 resulted in severe DNA repair phenotypes (L. Vondrova, unpublished  
345 data).

346 As the KITE subunits are stable components of the SMC complexes, we assume that  
347 the openings of the kleisin-vSMC interfaces are intrinsically coupled to their ATP cycles. It  
348 was proposed for the SMC/ScpAB complex that the opening of the kleisin-vSMC interface  
349 might be a part of its ATPase cycle generating loops along DNA strands [52, 53]. The  
350 SMC5/6 data are also consistent with the above notions as the ATPase activity of the SMC5/6  
351 complex is needed for its topological binding [36]. Interestingly, the Nse1-Nse3 KITE  
352 subunits bind DNA and this interaction could anchor or transduce DNA during the loop  
353 extrusion mediated by the SMC5/6 complex [37]. In contrast, dissociation of the kleisin-  
354 vSMC interface is tightly controlled by Pds5-Wapl regulators and is coupled to cohesin  
355 release from chromosome arms. Consistent with these differences, the Scc1-SMC3 fusion is  
356 tolerated in cells (as they can release cohesin by other ways; [20, 21, 23, 54]) while the fusion  
357 of Nse4 and SMC6 is lethal in fission yeast (L. Vondrova, unpublished data). Our results

358 suggest very similar mechanics shared by the prokaryotic SMC/ScpAB and eukaryotic  
359 SMC5/6 complexes (while distinguishing them from cohesin) and further support our recently  
360 proposed close evolutionary relationship between these complexes [7].

361         However, there are also apparent differences between the SMC/ScpAB and SMC5/6  
362 complexes. Particularly, the Nse1 KITE subunit contains an RING-finger ubiquitin ligase  
363 domain which may add a specific regulatory level to SMC5/6 [55]. Interestingly, our *in vitro*  
364 and *in vivo* experiments showed an Nse1-dependent Nse4 kleisin ubiquitination of its linker  
365 both in *S. pombe* and human proteins ([56]; P. Kolesar, unpublished data). Such a bulky post-  
366 translational modification on the Nse4 linker could alter its binding to KITE partners or its  
367 stiffness (i.e. alter the SMC5/6 ring opening). Altogether, similarities and differences  
368 between SMC complexes at different levels of their architecture may stay behind their  
369 different functions in genomes and remain an intriguing avenue of future research.

370

## 371 **MATERIAL AND METHODS**

### 372 **Plasmids**

373 Most of the Y2H constructs were prepared previously: pGBKT7-Nse3(aa1-328), pGADT7-  
374 Nse3(aa1-328) and pGBKT7-Nse4(aa1-300) constructs were created in [33], pOAD-  
375 Nse1(aa1-232) was created in [35], pGADT7-SMC6 (aa1-1140) was described in [37]. To  
376 generate pGBKT7-SMC5(aa1-1076) construct, the yeast *S.pombe* SMC5 cDNA was PCR  
377 amplified by oLV511+oLV486 (Supplementary Table 2) and inserted into the *NcoI-SalI*  
378 digested pGBKT7 by In-Fusion cloning protocol (Clontech). Nse5 was cloned into pGBKT7  
379 vector using *NcoI* and *SalI* sites and classical T4 ligase protocol.

380 To create the pGADT7-Nse4(aa1-300)/WT, pGADT7-Nse4(aa1-300)/del87-91 and pGADT7-  
381 Nse4(aa1-300)/ext constructs, Nse4 was PCR amplified from the corresponding p416ADH1-



382 Nse4 plasmids (see below) by oLV575+oLV576 and inserted into *NdeI/BamHI* digested  
383 pGADT7 by In-Fusion cloning protocol.

384 Multicomponent Y2H system was described in the protocol book series Methods in Molecular  
385 Biology [30]. The p416ADH1-Nse1(aa1–232) construct was created previously [35].  
386 Construction of p416ADH1-Nse4 (aa1–300), p416ADH1-Nse3(aa1–328)+Nse4(aa1–300) and  
387 p416ADH1-Nse3(aa1–328)+Nse4(aa1–300)+Nse1(aa1–232) was described previously ([30,  
388 37]; the vector name pPM587 equals to p416ADH1). p416ADH1-Nse4(aa1–300)+Nse1(aa1–  
389 232) and p416ADH1-Nse3(aa1–328)+Nse1(aa1–232) were prepared by PCR-amplification of  
390 ADH1-Nse1(1-232)-CYC terminator from p416ADH1-Nse1 by KB353+KB354 and its  
391 insertion into *KpnI* digested p416ADH1-Nse4 (aa1–300) and p416ADH1-Nse3(aa1–328) by  
392 In-Fusion protocol, respectively. The p416ADH1-Nse6(1-522) construct was prepared using  
393 PCR-amplification of Nse6 by EB77 + EB78 primers and insertion into *Sall/SpeI* digested  
394 p416ADH1 by In-Fusion protocol.

395 To prepare p416ADH1-Nse4-ext, *Sall* restriction site in the p416ADH1 multi-cloning site  
396 (MCS) was mutated by site-directed mutagenesis (SDM; see below) with oLV522 + oLV523.  
397 Then, *Sall* site was inserted by SDM behind the aa174 with oLV520 + oLV521. This  
398 construct was *Sall* digested, (G<sub>4</sub>S)<sub>6</sub> linker was amplified by oLV579 + oLV580 and inserted  
399 using the In-Fusion cloning protocol.

400 Construct for the *S. pombe* genome integration was prepared as follows: 1. Nse4 was cloned  
401 within the *BamHI* and *EcoRI* sites of the pSK-ura4 plasmid; 2. genomic sequence downstream  
402 of the Nse4 gene was PCR amplified (JP414 and JP415) and inserted to the pGEM-Easy  
403 vector (Promega); 3. The *SacI-Sall* fragment of the pSK-Nse4-ura4 plasmid was inserted to  
404 the *SacI-XhoI* digested pGEM-3'end construct to get the pGEM-Nse4(WT)-ura4 integration  
405 plasmid. To create pGEM-Nse4(T65R)-ura4 and pGEM-Nse4(L62C,T65R)-ura4, the Nse4  
406 sequences were PCR amplified from p416ADH1-Nse4 mutant constructs by oLV680 +

407 oLV681 (Supplementary Table 2) and inserted into *BamHI-EcoRI* digested pGEM-  
408 Nse4(WT)-ura4 integration construct by the In-Fusion cloning protocol.

409

#### 410 **Site-directed mutagenesis**

411 The QuikChange Lightning Site-Directed Mutagenesis Kit (Agilent Technologies) was used  
412 to create mutations in pGBKT7-SMC5, pGADT7-SMC6, p416ADH1-Nse4, p416ADH1-  
413 Nse3+Nse4+Nse1, pGADT7-Nse4, pOAD-Nse1, p416ADH1-Nse1, and pGEM-Nse4. The  
414 sequences of primers used for mutagenesis are listed in Supplementary Table 3.

415

#### 416 **Yeast two-hybrid assays**

417 The Gal4-based Y2H system was used to analyze *S. pombe* SMC5/6 complex interactions  
418 (detailed protocols are described in the book series Methods in Molecular Biology [30]).  
419 Briefly, three plasmids pGBKT7, pGADT7 and p416ADH1 with corresponding proteins were  
420 co-transformed into the *Saccharomyces cerevisiae* PJ69–4a strain and selected on SD -Leu, -  
421 Trp, -Ura plates. Drop tests were carried out on SD -Leu, -Trp, -Ura, -His (with 0; 0.3; 0.5; 1;  
422 2; 3; 4; 5; 10; 15; 20; 30 mM 3-aminotriazole) plates at 28°C. Each combination was co-  
423 transformed at least three times and at least three independent drop tests were carried out.

424

#### 425 **Generation of *nse4* mutant strains of *S. pombe***

426 Standard genetic techniques were used for preparation of fission yeast *S. pombe* diploid strain  
427 by crossing *ade6-M216* strain with *ade6-M210* [57]. The pGEM-Nse4-ura4 wild-type or  
428 mutant integration constructs (digested by *BamHI* and *Sall*) were transformed into the diploid  
429 strain and the transformants were selected on –ura –ade plates. Using standard genetic  
430 techniques, spores of the *nse4+*/*nse4-mutant* strains were generated and dissected.

431

## 432 **PEPSCAN-ELISA**

433 Was performed as described previously [28] with a peptide library (Mimotopes, Australia) of  
434 the aa 875-1024 region of the *S. pombe* Smc6 protein (Supplementary Table 1). The library  
435 was linked to biotin via an additional peptide spacer of serine–glycine–serine–glycine. The  
436 peptides were prebound to ELISA plates (coated with streptavidin) and washed three times  
437 with binding buffer (PBS with 0.5% Nonidet NP40). Then, *S. pombe* His-S-Nse4 (aa1-150)  
438 protein was added and incubated overnight. Unbound protein was washed (three times) and  
439 the peptide-bound Nse4 protein was quantified using anti-His (Sigma H1029, 1:10000) and  
440 anti-mouse HRP-conjugated (Sigma A0168, 1:10000) antibodies, respectively. *H. sapiens*  
441 His-TRF2 (aa1-542) protein was used as a negative control in the same way [29].

442

## 443 **FIGURE LEGENDS:**

### 444 **Figure 1. Nse4 binds neck region of the SMC6 protein.**

445 Peptide library (A) and multi-component yeast two-hybrid systems (B-D) were employed to  
446 determine SMC6 region and residues binding to Nse4. (A) Quantification of relative binding  
447 of the Nse4(1-150) protein (Nse4; red columns) to the SMC6 synthetic peptides (listed in  
448 Suppl. Table S1) using the PEPSCAN-ELISA method. The SMC6(aa960-984) peptide  
449 exhibits the highest affinity and specificity to Nse4. Results show mean  $\pm$  SEM of 3  
450 independent measurements. His-TRF2 protein (TRF2; white columns) was used in the control  
451 experiment. (B-D) Impact of mutations on the stability of the following SMC6 complexes was  
452 tested: SMC6-Nse4-Nse3-Nse1 (B), SMC6-Nse4-SMC5 (C) and SMC6-Nse5-Nse6 (D).  
453 Schematic representation of the complexes is at the right side of each panel. (B) The full-  
454 length hybrid SMC6 (fused to Gal4AD domain) and Nse4 (fused to Gal4BD domain)  
455 constructs were co-transformed together with Nse1+Nse3 plasmid (p416ADH1 vector  
456 backbone) into *S. cerevisiae* PJ69 cells. Formation and stability of the SMC6-Nse4-Nse3-

457 Nse1 complex was scored by growth of yeast PJ69 transformants on plates without leucine,  
458 tryptophan, uracil and histidine, containing 0.3 mM 3-Amino-1,2,4-triazole (-L,T,U,H, 0.3AT  
459 panel). The L964A, L965A, L968A, E969A, L972A and R975A mutations reduce stability of  
460 the SMC6 complexes. (C) Similarly, the full-length hybrid SMC6 (fused to Gal4AD domain)  
461 and SMC5 (fused to Gal4BD domain) were co-transformed together with non-hybrid Nse4  
462 full-length construct (p416ADH1 vector) and stability of the SMC5-Nse4-SMC6 complex  
463 was scored on plates containing 0.5 mM 3-Amino-1,2,4-triazole (-L,T,U,H, 0.5AT panel).  
464 The L964A, L965A, L968A, E969A, L972A and R975A mutations reduce stability of the  
465 SMC6 complexes. (D) In the control experiment, the same mutations were tested in the  
466 SMC6-Nse5-Nse6 complex (constituted of the full-length Gal4AD-SMC6, Gal4BD-Nse5 and  
467 non-hybrid Nse6). Stability of the SMC6-Nse5-Nse6 complex was scored on plates  
468 containing 3 mM 3-Amino-1,2,4-triazole (-L,T,U,H, 3AT panel). The L964A, L968A and  
469 E969A mutations affect all SMC6 complexes (B-D) while L965A, L972A and R975A  
470 mutations reduce only stability of SMC6-Nse4 complexes (B and C), suggesting that the  
471 highly conserved L965, L972 and L975 residues (Suppl. Fig. S1B) are specifically required  
472 for the SMC6 interaction with Nse4. Wild-type (WT) or mutant versions of SMC6 are  
473 labelled in blue below the panels; “-”, control empty vector; “+”, co-transformed construct (as  
474 labelled at the left side). Growth of the transformants was verified on control plates without  
475 leucine, tryptophan and uracil (-L,T,U). All mY2H tests were repeated at least 3 times.

476

477 **Figure 2. Binding of the Nse4 helix H3 to SMC6 is essential for yeast viability.**

478 Identification of the SMC6-binding residues within the Nse4 helix H3 region (aa62-68). (A)  
479 Stability of the SMC5-Nse4-SMC6 complex was scored by 3Y2H on plates containing 0.5  
480 mM 3-Amino-1,2,4-triazole (-L,T,U,H, 0.5 AT panel; further details as in Fig. 1). The  
481 Nse4/L62C, K64C, T65R, D67C, and L68C mutations reduce stability of the SMC6

482 complexes. In the control experiment (B), the same mutations were tested for the Nse4-Nse3  
483 interaction in the classical Y2H system (constituted of the full-length Gal4AD-Nse4 and  
484 Gal4BD-Nse3). Interactions were scored on plates containing 10 mM 3-Amino-1,2,4-triazole  
485 (-L,T,U,H, 10AT panel). The K64C and D67C mutations affect all Nse4 complexes (A and  
486 B). Intact L62, T65 and L68 Nse4 residues are required specifically for binding to SMC6.  
487 Wild-type (WT) or mutant versions of Nse4 are labelled in violet below the panels (further  
488 details as in Fig. 1). (C) Alignment of the Nse4 helix H3 (of the N-terminal HTH domain).  
489 The orthologs are from *Schizosaccharomyces pombe* (*S.p.*), *Aspergillus nidulans* (*A.n.*),  
490 *Aspergillus clavatus* (*A.c.*), *Danio rerio* (*D.r.*), *Xenopus laevis* (*X.l.*), *Ornithorhynchus*  
491 *anatinus* (*O.a.*), *Monodelphis domestica* (*M.d.*), *Loxodonta africana* (*L.a.*), *Dasyurus*  
492 *novemcinctus* (*D.n.*), *Mus musculus* (*M.m.*), *Homo sapiens* (*H.s.*). Note that there are two  
493 Nse4 genes in the placental mammals denoted as A and B. “+”, mutation not affecting Nse4  
494 interactions; “-“, mutation disrupting all Nse4 complexes; red minus, mutation specifically  
495 disrupting the Nse4-SMC6 interaction. Amino acid shading represents following conserved  
496 amino acids: *dark green*, hydrophobic and aromatic; *light green*, polar; *pink*, basic; *blue*,  
497 acidic. (D) Tetrad dissection analysis of yeast *S. pombe* diploid strains *nse4<sup>+</sup>/nse4-T65R* (top)  
498 and *nse4<sup>+</sup>/nse4-L62C, T65R* (bottom). The *nse4-T65RC* and *nse4-L62C, T65R* mutations are  
499 lethal, suggesting essential role of the Nse4-SMC6 interaction.

500

### 501 **Figure 3. A role of Nse4 and ATP molecules in bridging of SMC5-SMC6.**

502 (A) Nse4 is essential for the bridging of the hybrid SMC5-SMC6 constructs (columns 1-4).  
503 The SMC5/E995 conserved residue was mutated to glutamine (EQ) to inhibit ATP hydrolysis.  
504 The ATP retention has only mild additive effect on the stability of the SMC5-Nse4-SMC6  
505 complex (scored on plates containing increasing concentrations of 3-Amino-1,2,4-triazole).  
506 The Nse4 mutations affected the stability of the wild-type SMC5 complexes more

507 dramatically than the stability of the SMC5/E995Q mutant complexes (compare odd and even  
508 columns). Wild-type (WT) or E995Q (EQ) mutant versions of SMC5 are labelled in grey  
509 below the panels (further details as in Figs. 1 and 2). (B) Addition of the Nse1 and Nse3 KITE  
510 proteins to the above SMC5/SMC6/Nse4 system stabilizes the SMC5-Nse4-SMC6 bridge.  
511 Although the KITE proteins stabilize the ATP-free SMC5-Nse4-SMC6 complex (columns 1  
512 and 3), they destabilize ATP-bound complex (columns 2 and 4). The Nse4 mutations decrease  
513 stability of the ATP-free SMC5-SMC6-Nse4-Nse3-Nse1 complex gradually (columns 5, 7, 9  
514 and 11) while the stability of the ATP-bound complexes drops first (columns 6, 8, and 10) and  
515 then it recovers in the L62C, T65R double mutant (column 12).

516

517 **Figure 4. KITE proteins constrain Nse4 kleisin linker.**

518 (A) The Nse1-Nse3-Nse4 subcomplex is held by mutual interactions between its subunits.  
519 The Nse4/del87-91 (del) deletion disturbs the Nse3-Nse4 binary interaction (columns 3 and 4)  
520 and the Nse1/Q18A, M21A (QM) double mutation abrogates the Nse1-Nse3 binary  
521 interaction (columns 9 and 10), but they do not alter stability of the Nse1-Nse3-Nse4 trimer  
522 individually (columns 6 and 7). However, combination of these two mutations reduces the  
523 stability of Nse1-Nse3-Nse4 significantly (column 8). (B) The combination of the  
524 Nse4/del87-91 and Nse1/Q18A, M21A mutations compromises stability of the wild-type  
525 SMC5-SMC6-Nse4-Nse3-Nse1 complex (compare columns 6 and 8), but increases the  
526 stability of the ATP-bound complex (compare columns 7 and 9). Notably, there is no  
527 difference between stability of ATP-free and ATP-bound complexes (compare columns 8 and  
528 9), suggesting that the binding of KITE proteins to Nse4 destabilizes ATP-bound complexes.  
529 Furthermore, the Nse4/del87-91 mutation alone also partially suppresses the instability of the  
530 ATP-bound complex (column 11), suggesting that the binding of Nse3 to Nse4 linker  
531 constrains the linker. (C) Schematic of the Nse4 regions with their binding partners (depicted

532 above). The 30 amino acid extension is inserted at the end of the linker. (D) The 30 amino  
533 acid extension (ext) was tested in control experiments for the stability of either Nse3-Nse4  
534 binary interaction (column 4) or Nse1-Nse3-Nse4 trimer (column 6). (E) The extension of the  
535 linker results in partial relieve of the ATP-induced tension in the SMC5/E995Q complex  
536 (compare columns 5 and 6).

537

### 538 **Figure 5. SMC5/6 ATPase cycle model.**

539 Binding of ATP to the SMC heads leads to their dimerization and changes their mutual  
540 position (states 1-3). (A) Nse4 bridges SMC heads and supports the ATP-mediated head  
541 dimerization in the absence of the KITE proteins. (B) Addition of the Nse1 and Nse3 KITE  
542 proteins stabilizes the otherwise flexible Nse4 linker in a position that is favoured in the ATP-  
543 free complex (state B1). In contrast, the KITE-bound Nse4 linker shape is adverse in the  
544 ATP-bound complex (state B3). The stiff KITE-bound Nse4 linker transduces a pulling force  
545 generated by the binding of ATP to the SMC5-SMC6 heads and forces the Nse4-SMC6  
546 interface apart (state B3). After ATP hydrolysis, the SMC5-SMC6 head dimer is dissolved  
547 and Nse4 is reattached to the SMC6 arm (state B4).

548

### 549 **SUPPORTING INFORMATION**

#### 550 **Supplementary Figure S1. Nse4 binds neck region of SMC6.**

551 Peptide library (A) and multi-component yeast two-hybrid systems (C-E) were employed to  
552 determine the SMC6 region and residues binding to Nse4. (A) Quantification of relative  
553 binding of the Nse4(1-150) protein (Nse4; red columns) to the SMC6 synthetic peptides  
554 (listed in Supplementary Table 1) using the PEPSCAN-ELISA method. The SMC6(aa960-  
555 984) peptide exhibits the highest affinity and specificity to Nse4. Results show mean  $\pm$  SEM  
556 of 3 independent measurements. His-TRF2 protein (TRF2; white column) was used in the

557 control experiment. (B) Alignment of the C-terminal SMC6 neck region. The orthologs are  
558 from *Schizosaccharomyces pombe* (*S.p.*), *Aspergillus nidulans* (*A.n.*), *Aspergillus clavatus*  
559 (*A.c.*), *S. cerevisiae* (*S.c.*), *Danio rerio* (*D.r.*), *Xenopus laevis* (*X.l.*), *Ornithorhynchus anatinus*  
560 (*O.a.*), *Loxodonta africana* (*L.a.*), *Monodelphis domestica* (*M.d.*), *Dasypus novemcinctus*  
561 (*D.n.*), *Mus musculus* (*M.m.*), *Homo sapiens* (*H.s.*). “+”, mutation not affecting SMC6  
562 interactions; “-“, mutation disrupting all SMC6 complexes; red minus, mutation specifically  
563 disrupting the Nse4-SMC6 interaction. Amino acid shading represents following conserved  
564 amino acids: *dark green*, hydrophobic and aromatic; *light green*, polar; *pink*, basic. (C-E) To  
565 identify Nse4-binding residues, stability of the following SMC6 mutant complexes was  
566 tested: SMC6-Nse4-Nse3-Nse1 (C), SMC6-Nse4-SMC5 (D) and SMC6-Nse5-Nse6 (E). (C)  
567 The full-length hybrid SMC6 (fused to Gal4AD domain) and Nse4 (fused to Gal4BD domain)  
568 were co-transformed together with Nse1-Nse3 construct (p416ADH1 vector) into PJ69 cells.  
569 Formation and stability of the SMC6-Nse4-Nse3-Nse1 complex was scored by growth of  
570 yeast PJ69 transformants on plates without Leu, Trp, Ura and His, containing 0.3 mM 3-  
571 Amino-1,2,4-triazole (-L,T,U,H, 0.3AT panel). (D) Similarly, the full-length SMC6 (fused to  
572 Gal4AD domain) and SMC5 (fused to Gal4BD domain) were co-transformed together with  
573 Nse4 full-length construct (in p416ADH1 vector) and stability of the SMC5-Nse4-SMC6  
574 complex was scored on plates containing 0.5 mM 3-Amino-1,2,4-triazole (-L,T,U,H, 0.5AT  
575 panel). The L964A, L965A, L968A, E969A, L972A and R975A mutations reduce stability of  
576 the SMC6-Nse4 complexes (C and D). (E) In the control experiment, the same mutations  
577 were introduced to SMC6-Nse5-Nse6 complex (constituted of the full-length Gal4AD-SMC6,  
578 Gal4BD-Nse5 and non-hybrid Nse6). Stability of the SMC6-Nse5-Nse6 complex was scored  
579 on plates containing 3 mM 3-Amino-1,2,4-triazole (-L,T,U,H, 3AT panel). The L964A,  
580 L968A and E969A mutations affected all SMC6 complexes (C-E). In contrast, the highly  
581 conserved L965, L972 and L975 SMC6 residues (panel B) were required specifically for



582 binding to Nse4. Wild-type (WT) or mutant versions of SMC6 are labelled in blue below the  
583 panels; “-“, control empty vector; “+“, co-transformed construct (as labelled at the left side).  
584 Growth of the transformants was verified on control plates without leucine, tryptophan and  
585 uracil (-L,T,U). All Y2H tests were repeated at least 3 times.

586

587 **Supplementary Figure S2. The SMC5-SMC6-Nse4-Nse3-Nse1 instability is dependent on**  
588 **the ATP binding and SMC5-SMC6 head dimerization.**

589 (A-B) Alignment of the conserved SMC head motifs mutated in the SMC5 and SMC6  
590 constructs. Arrows point to the positions of the fission yeast SMC5/K57I mutation in the  
591 Walker A motif disturbing ATP binding (A), the SMC6/S1045R mutation in the Signature  
592 motif abrogating ATP-mediated SMC5-SMC6 head dimerization (B), and the SMC5/E995Q  
593 mutation in the Walker B motif inhibiting ATP hydrolysis (B). The SMC homologs are from  
594 *Bacillus subtilis* (*B.s.*), *Schizosaccharomyces pombe* (*S.p.*), *Homo sapiens* (*H.s.*). Amino acid  
595 shading as in Fig. S1. (C) Stability of the SMC5-SMC6-Nse4 (columns 1-6) and SMC5-  
596 SMC6-Nse4-Nse3-Nse1 (columns 7-12) complexes was scored on plates containing  
597 increasing concentrations of 3-Amino-1,2,4-triazole (AT). The SMC5/K57I (KI) mutation  
598 disturbing ATP binding and SMC6/S1045R (SR) mutation abrogating ATP-mediated SMC5-  
599 SMC6 head dimerization have no effect on the SMC5-SMC6-Nse4 complex irrespective of  
600 the SMC5/E995Q mutation (columns 3-6). In contrast, destabilizing effect of the  
601 SMC5/E995Q mutation was fully suppressed by both KI and SR mutations in the SMC5-  
602 SMC6-Nse4-Nse3-Nse1 complex (compare columns 8, 10 and 12), suggesting that the  
603 instability is caused by the ATP binding and ATP-mediated head dimerization. Mutant  
604 versions of SMC5 and SMC6 are labelled in grey and blue, respectively (further details as in  
605 Fig. S1).

606

607 **Supplementary Table 1: SMC6(aa875-1024) peptide library**

608

609 **Supplementary Table 2: Primers used for PCR**

610

611 **Supplementary Table 3: Primers used for site-directed mutagenesis**

612

613 **ACKNOWLEDGMENTS**

614 We thank C. Hofr for providing the purified His-hTRF2 protein for the ELISA assays.

615 We are grateful to A.R. Lehmann and K. Zabrady for the critical reading of our manuscript.

616

617 **REFERENCES**

618 1. Schwarzer W, Abdennur N, Goloborodko A, Pekowska A, Fudenberg G, Loe-Mie Y,

619 et al. Two independent modes of chromatin organization revealed by cohesin removal.

620 Nature. 2017; 551(7678):51-6. Epub 2017/09/27. doi: 10.1038/nature24281. PubMed PMID:

621 29094699; PubMed Central PMCID: PMC5687303.

622 2. Kschonsak M, Haering CH. Shaping mitotic chromosomes: From classical concepts to

623 molecular mechanisms. Bioessays. 2015;37(7):755-66. doi: 10.1002/bies.201500020.

624 PubMed PMID: 25988527; PubMed Central PMCID: PMC5683672.

625 3. Aragon L. The Smc5/6 Complex: New and Old Functions of the Enigmatic Long-

626 Distance Relative. In: Bonini NM, editor. Annual Review of Genetics, Vol 52. Annual

627 Review of Genetics. 52. Palo Alto: Annual Reviews; 2018. p. 89-107.

628 4. Palecek JJ. SMC5/6: Multifunctional Player in Replication. Genes. 2019;10(1):E7.

629 doi: 10.3390/genes10010007. PubMed PMID: WOS:000459743800007.

630 5. Bürmann F, Gruber S. SMC condensin: promoting cohesion of replicon arms. Nat

631 Struct Mol Biol. 2015;22(9):653-5. doi: 10.1038/nsmb.3082. PubMed PMID: 26333713.

- 632 6. van der Crabben SN, Hennis MP, McGregor GA, Ritter DI, Nagamani SCS, Wells  
633 OS, et al. Destabilized SMC5/6 complex leads to chromosome breakage syndrome with  
634 severe lung disease. *Journal of Clinical Investigation*. 2016;126(8):2881-92. doi:  
635 10.1172/jci82890. PubMed PMID: WOS:000381943000013.
- 636 7. Palecek JJ, Gruber S. Kite Proteins: a Superfamily of SMC/Kleisin Partners  
637 Conserved Across Bacteria, Archaea, and Eukaryotes. *Structure*. 2015;23(12):2183-90. doi:  
638 10.1016/j.str.2015.10.004. PubMed PMID: WOS:000366171500001.
- 639 8. Wells JN, Gligoris TG, Nasmyth KA, Marsh JA. Evolution of condensin and cohesin  
640 complexes driven by replacement of Kite by Hawk proteins. *Curr Biol*. 2017;27(1):R17-R8.  
641 doi: 10.1016/j.cub.2016.11.050. PubMed PMID: 28073014; PubMed Central PMCID:  
642 PMC5228436.
- 643 9. Burmann F, Basfeld A, Nunez RV, Diebold-Durand ML, Wilhelm L, Gruber S. Tuned  
644 SMC Arms Drive Chromosomal Loading of Prokaryotic Condensin. *Molecular Cell*.  
645 2017;65(5):861-+. doi: 10.1016/j.molcel.2017.01.026. PubMed PMID:  
646 WOS:000396431700010.
- 647 10. Diebold-Durand ML, Lee H, Ruiz Avila LB, Noh H, Shin HC, Im H, et al. Structure  
648 of Full-Length SMC and Rearrangements Required for Chromosome Organization. *Mol Cell*.  
649 2017;67(2):334-47.e5. Epub 2017/07/06. doi: 10.1016/j.molcel.2017.06.010. PubMed PMID:  
650 28689660; PubMed Central PMCID: PMC5526789.
- 651 11. Nasmyth K, Haering CH. The structure and function of SMC and kleisin complexes.  
652 *Annu Rev Biochem*. 2005;74:595-648.
- 653 12. Hassler M, Shaltiel IA, Haering CH. Towards a Unified Model of SMC Complex  
654 Function. *Curr Biol*. 2018;28(21):R1266-R81. doi: 10.1016/j.cub.2018.08.034. PubMed  
655 PMID: 30399354.

- 656 13. Gligoris T, Löwe J. Structural Insights into Ring Formation of Cohesin and Related  
657 Smc Complexes. *Trends Cell Biol.* 2016;26(9):680-93. Epub 2016/04/28. doi:  
658 10.1016/j.tcb.2016.04.002. PubMed PMID: 27134029; PubMed Central PMCID:  
659 PMCPMC4989898.
- 660 14. Lammens A, Schele A, Hopfner KP. Structural biochemistry of ATP-driven  
661 dimerization and DNA-stimulated activation of SMC ATPases. *Curr Biol.* 2004;14(19):1778-  
662 82.
- 663 15. Arumugam P, Gruber S, Tanaka K, Haering CH, Mechtler K, Nasmyth K. ATP  
664 hydrolysis is required for cohesin's association with chromosomes. *Curr Biol.*  
665 2003;13(22):1941-53.
- 666 16. Bürmann F, Shin HC, Basquin J, Soh YM, Giménez-Oya V, Kim YG, et al. An  
667 asymmetric SMC-kleisin bridge in prokaryotic condensin. *Nat Struct Mol Biol.*  
668 2013;20(3):371-9. Epub 2013/01/27. doi: 10.1038/nsmb.2488. PubMed PMID: 23353789.
- 669 17. Gligoris TG, Scheinost JC, Bürmann F, Petela N, Chan KL, Uluocak P, et al. Closing  
670 the cohesin ring: structure and function of its Smc3-kleisin interface. *Science.*  
671 2014;346(6212):963-7. doi: 10.1126/science.1256917. PubMed PMID: 25414305; PubMed  
672 Central PMCID: PMCPMC4300515.
- 673 18. Zawadzka K, Zawadzki P, Baker R, Rajasekar KV, Wagner F, Sherratt DJ, et al.  
674 MukB ATPases are regulated independently by the N- and C-terminal domains of MukF  
675 kleisin. *Elife.* 2018;7. Epub 2018/01/11. doi: 10.7554/eLife.31522. PubMed PMID:  
676 29323635; PubMed Central PMCID: PMCPMC5812716.
- 677 19. Murayama Y, Uhlmann F. DNA Entry into and Exit out of the Cohesin Ring by an  
678 Interlocking Gate Mechanism. *Cell.* 2015;163(7):1628-40. doi: 10.1016/j.cell.2015.11.030.  
679 PubMed PMID: 26687354; PubMed Central PMCID: PMCPMC4701713.

- 680 20. Beckouët F, Srinivasan M, Roig MB, Chan KL, Scheinost JC, Batty P, et al. Releasing  
681 Activity Disengages Cohesin's Smc3/Sccl Interface in a Process Blocked by Acetylation. *Mol*  
682 *Cell*. 2016;61(4):563-74. doi: 10.1016/j.molcel.2016.01.026. PubMed PMID: 26895425;  
683 PubMed Central PMCID: PMC4769318.
- 684 21. Buheitel J, Stemmann O. Prophase pathway-dependent removal of cohesin from  
685 human chromosomes requires opening of the Smc3-Sccl gate. *EMBO J*. 2013;32(5):666-76.  
686 Epub 2013/01/29. doi: 10.1038/emboj.2013.7. PubMed PMID: 23361318; PubMed Central  
687 PMCID: PMC3590994.
- 688 22. Eichinger CS, Kurze A, Oliveira RA, Nasmyth K. Disengaging the Smc3/kleisin  
689 interface releases cohesin from *Drosophila* chromosomes during interphase and mitosis.  
690 *EMBO J*. 2013;32(5):656-65. Epub 2013/01/22. doi: 10.1038/emboj.2012.346. PubMed  
691 PMID: 23340528; PubMed Central PMCID: PMC3590983.
- 692 23. Chan KL, Roig MB, Hu B, Beckouët F, Metson J, Nasmyth K. Cohesin's DNA exit  
693 gate is distinct from its entrance gate and is regulated by acetylation. *Cell*. 2012;150(5):961-  
694 74. Epub 2012/08/14. doi: 10.1016/j.cell.2012.07.028. PubMed PMID: 22901742; PubMed  
695 Central PMCID: PMC3485559.
- 696 24. Elbatsh AMO, Haarhuis JHI, Petela N, Chapard C, Fish A, Celie PH, et al. Cohesin  
697 Releases DNA through Asymmetric ATPase-Driven Ring Opening. *Mol Cell*.  
698 2016;61(4):575-88. doi: 10.1016/j.molcel.2016.01.025. PubMed PMID: 26895426; PubMed  
699 Central PMCID: PMC4769319.
- 700 25. Minnen A, Bürmann F, Wilhelm L, Anchimiuk A, Diebold-Durand ML, Gruber S.  
701 Control of Smc Coiled Coil Architecture by the ATPase Heads Facilitates Targeting to  
702 Chromosomal ParB/parS and Release onto Flanking DNA. *Cell Rep*. 2016;14(8):2003-16.  
703 Epub 2016/02/18. doi: 10.1016/j.celrep.2016.01.066. PubMed PMID: 26904953; PubMed  
704 Central PMCID: PMC4785775.

- 705 26. Kamada K, Su'etsugu M, Takada H, Miyata M, Hirano T. Overall Shapes of the SMC-  
706 ScpAB Complex Are Determined by Balance between Constraint and Relaxation of Its  
707 Structural Parts. *Structure*. 2017;25(4):603-16.e4. Epub 2017/03/09. doi:  
708 10.1016/j.str.2017.02.008. PubMed PMID: 28286005.
- 709 27. Palecek J, Vidot S, Feng M, Doherty AJ, Lehmann AR. The SMC5-6 DNA repair  
710 complex: Bridging of the SMC5-6 heads by the Kleisin, NSE4, and non-Kleisin subunits. *J*  
711 *Biol Chem*. 2006;281:36952-9. PubMed PMID: 17005570.
- 712 28. Guerineau M, Kriz Z, Kozakova L, Bednarova K, Janos P, Palecek J. Analysis of the  
713 Nse3/MAGE-Binding Domain of the Nse4/EID Family Proteins. *PLoS One*.  
714 2012;7(4):e35813.
- 715 29. Nečasová I, Janoušková E, Klumpler T, Hofr C. Basic domain of telomere guardian  
716 TRF2 reduces D-loop unwinding whereas Rap1 restores it. *Nucleic Acids Research*.  
717 2017;45(21):12170-80. doi: 10.1093/nar/gkx812.
- 718 30. Paleček JJ, Vondrová L, Zábřady K, Otočka J. Multicomponent Yeast Two-Hybrid  
719 System: Applications to Study Protein-Protein Interactions in SMC Complexes. *Methods Mol*  
720 *Biol*. 2019;2004:79-90. doi: 10.1007/978-1-4939-9520-2\_7. PubMed PMID: 31147911.
- 721 31. Duan X, Yang Y, Chen YH, Arenz J, Rangi GK, Zhao X, et al. Architecture of the  
722 Smc5/6 Complex of *Saccharomyces cerevisiae* Reveals a Unique Interaction between the  
723 Nse5-6 Subcomplex and the Hinge Regions of Smc5 and Smc6. *J Biol Chem*.  
724 2009;284(13):8507-15. PubMed PMID: 19141609.
- 725 32. Diaz M, Pecinkova P, Nowicka A, Baroux C, Sakamoto T, Gandha PY, et al. SMC5/6  
726 Complex Subunit NSE4A is Involved in DNA Damage Repair and Seed Development in  
727 *Arabidopsis*. *Plant Cell*. 2019. Epub 2019/04/29. doi: 10.1105/tpc.18.00043. PubMed PMID:  
728 31036599.

- 729 33. Sergeant J, Taylor E, Palecek J, Fousteri M, Andrews E, Sweeney S, et al.  
730 Composition and architecture of the Schizosaccharomyces pombe Rad18 (Smc5-6) complex.  
731 Mol Cell Biol. 2005;25:172-84.
- 732 34. Hassler M, Shaltiel IA, Kschonsak M, Simon B, Merkel F, Thärichen L, et al.  
733 Structural Basis of an Asymmetric Condensin ATPase Cycle. Mol Cell. 2019;74(6):1175-  
734 88.e9. doi: 10.1016/j.molcel.2019.03.037. PubMed PMID: 31226277.
- 735 35. Hudson JJR, Bednarova K, Kozakova L, Liao C, Guerineau M, Colnaghi R, et al.  
736 Interactions between the Nse3 and Nse4 Components of the SMC5-6 Complex Identify  
737 Evolutionarily Conserved Interactions between MAGE and EID Families. Plos One.  
738 2011;6(2). doi: 10.1371/journal.pone.0017270. PubMed PMID: WOS:000287764100039.
- 739 36. Kanno T, Berta DG, Sjögren C. The Smc5/6 Complex Is an ATP-Dependent  
740 Intermolecular DNA Linker. Cell Rep. 2015;12(9):1471-82. doi:  
741 10.1016/j.celrep.2015.07.048. PubMed PMID: 26299966.
- 742 37. Zabradý K, Adamus M, Vondrova L, Liao C, Skoupilova H, Novakova M, et al.  
743 Chromatin association of the SMC5/6 complex is dependent on binding of its NSE3 subunit  
744 to DNA. Nucleic Acids Res. 2016;44(3):1064-79. doi: 10.1093/nar/gkv1021. PubMed PMID:  
745 26446992; PubMed Central PMCID: PMC4756808.
- 746 38. Fousteri MI, Lehmann AR. A novel SMC protein complex in Schizosaccharomyces  
747 pombe contains the Rad18 DNA repair protein. EMBO J. 2000;19(7):1691-702.
- 748 39. Kamada K, Miyata M, Hirano T. Molecular basis of SMC ATPase activation: role of  
749 internal structural changes of the regulatory subcomplex ScpAB. Structure. 2013;21(4):581-  
750 94. doi: 10.1016/j.str.2013.02.016. PubMed PMID: 23541893.
- 751 40. Woo JS, Lim JH, Shin HC, Suh MK, Ku B, Lee KH, et al. Structural studies of a  
752 bacterial condensin complex reveal ATP-dependent disruption of intersubunit interactions.  
753 Cell. 2009;136(1):85-96.

- 754 41. Gloyd M, Ghirlando R, Guarné A. The role of MukE in assembling a functional  
755 MukBEF complex. *J Mol Biol.* 2011;412(4):578-90. Epub 2011/08/10. doi:  
756 10.1016/j.jmb.2011.08.009. PubMed PMID: 21855551; PubMed Central PMCID:  
757 PMCPMC3482342.
- 758 42. Pebernard S, Wohlschlegel J, McDonald WH, Yates JR, 3rd, Boddy MN. The Nse5-  
759 Nse6 dimer mediates DNA repair roles of the Smc5-Smc6 complex. *Mol Cell Biol.*  
760 2006;26(5):1617-30. PubMed PMID: 16478984.
- 761 43. Ganji M, Shaltiel IA, Bisht S, Kim E, Kalichava A, Haering CH, et al. Real-time  
762 imaging of DNA loop extrusion by condensin. *Science.* 2018. Epub 2018/02/22. doi:  
763 10.1126/science.aar7831. PubMed PMID: 29472443.
- 764 44. Hirano M, Hirano T. Positive and negative regulation of SMC-DNA interactions by  
765 ATP and accessory proteins. *Embo J.* 2004;23(13):2664-73. Epub 004 Jun 3.
- 766 45. Ouyang Z, Yu H. Releasing the cohesin ring: A rigid scaffold model for opening the  
767 DNA exit gate by Pds5 and Wapl. *Bioessays.* 2017;39(4). Epub 2017/02/21. doi:  
768 10.1002/bies.201600207. PubMed PMID: 28220956.
- 769 46. Soh YM, Bürmann F, Shin HC, Oda T, Jin KS, Toseland CP, et al. Molecular basis for  
770 SMC rod formation and its dissolution upon DNA binding. *Mol Cell.* 2015;57(2):290-303.  
771 doi: 10.1016/j.molcel.2014.11.023. PubMed PMID: 25557547; PubMed Central PMCID:  
772 PMCPMC4306524.
- 773 47. Chapard C, Jones R, van Oepen T, Scheinost JC, Nasmyth K. Sister DNA Entrapment  
774 between Juxtaposed Smc Heads and Kleisin of the Cohesin Complex. *Mol Cell.*  
775 2019;75(2):224-37.e5. Epub 2019/06/11. doi: 10.1016/j.molcel.2019.05.023. PubMed PMID:  
776 31201089; PubMed Central PMCID: PMCPMC6675936.
- 777 48. Bürmann F, Lee BG, Than T, Sinn L, O'Reilly FJ, Yatskevich S, et al. A folded  
778 conformation of MukBEF and cohesin. *Nat Struct Mol Biol.* 2019;26(3):227-36. Epub



- 779 2019/03/04. doi: 10.1038/s41594-019-0196-z. PubMed PMID: 30833788; PubMed Central  
780 PMCID: PMC6433275.
- 781 49. Hara K, Zheng G, Qu Q, Liu H, Ouyang Z, Chen Z, et al. Structure of cohesin  
782 subcomplex pinpoints direct shugoshin-Wapl antagonism in centromeric cohesion. *Nat Struct*  
783 *Mol Biol.* 2014;21(10):864-70. Epub 2014/08/31. doi: 10.1038/nsmb.2880. PubMed PMID:  
784 25173175; PubMed Central PMCID: PMC4190070.
- 785 50. Muir KW, Kschonsak M, Li Y, Metz J, Haering CH, Panne D. Structure of the Pds5-  
786 Scc1 Complex and Implications for Cohesin Function. *Cell Rep.* 2016;14(9):2116-26. Epub  
787 2016/02/25. doi: 10.1016/j.celrep.2016.01.078. PubMed PMID: 26923589.
- 788 51. Lee BG, Roig MB, Jansma M, Petela N, Metson J, Nasmyth K, et al. Crystal Structure  
789 of the Cohesin Gatekeeper Pds5 and in Complex with Kleisin Scc1. *Cell Rep.*  
790 2016;14(9):2108-15. Epub 2016/02/25. doi: 10.1016/j.celrep.2016.02.020. PubMed PMID:  
791 26923598; PubMed Central PMCID: PMC4793087.
- 792 52. Baxter J, Oliver AW, Schalbetter SA. Are SMC Complexes Loop Extruding Factors?  
793 Linking Theory With Fact. *Bioessays.* 2019;41(1):e1800182. Epub 2018/12/03. doi:  
794 10.1002/bies.201800182. PubMed PMID: 30506702.
- 795 53. Vazquez Nunez R, Ruiz Avila LB, Gruber S. Transient DNA Occupancy of the SMC  
796 Interarm Space in Prokaryotic Condensin. *Mol Cell.* 2019;75(2):209-23.e6. Epub 2019/06/11.  
797 doi: 10.1016/j.molcel.2019.05.001. PubMed PMID: 31201090.
- 798 54. Gruber S, Arumugam P, Katou Y, Kuglitsch D, Helmhart W, Shirahige K, et al.  
799 Evidence that loading of cohesin onto chromosomes involves opening of its SMC hinge. *Cell.*  
800 2006;127(3):523-37.
- 801 55. McDonald WH, Pavlova Y, Yates JR, Boddy MN. Novel essential DNA repair  
802 proteins Nse1 and Nse2 are subunits of the fission yeast Smc5-Smc6 complex. *J Biol Chem.*  
803 2003;278(46):45460-7. doi: 10.1074/jbc.M308828200. PubMed PMID: 12966087.

- 804 56. Kozakova L, Vondrova L, Stejskal K, Charalabous P, Kolesar P, Lehmann AR, et al.  
805 The melanoma-associated antigen 1 (MAGEA1) protein stimulates the E3 ubiquitin-ligase  
806 activity of TRIM31 within a TRIM31-MAGEA1-NSE4 complex. *Cell Cycle*.  
807 2015;14(6):920-30. doi: 10.1080/15384101.2014.1000112. PubMed PMID:  
808 WOS:000351598200022.
- 809 57. Moreno S, Klar A, Nurse P. Molecular genetic analysis of fission yeast  
810 *Schizosaccharomyces pombe*. *Methods Enzymol*. 1991;194:795-823. doi: 10.1016/0076-  
811 6879(91)94059-1. PubMed PMID: 2005825.
- 812

**A**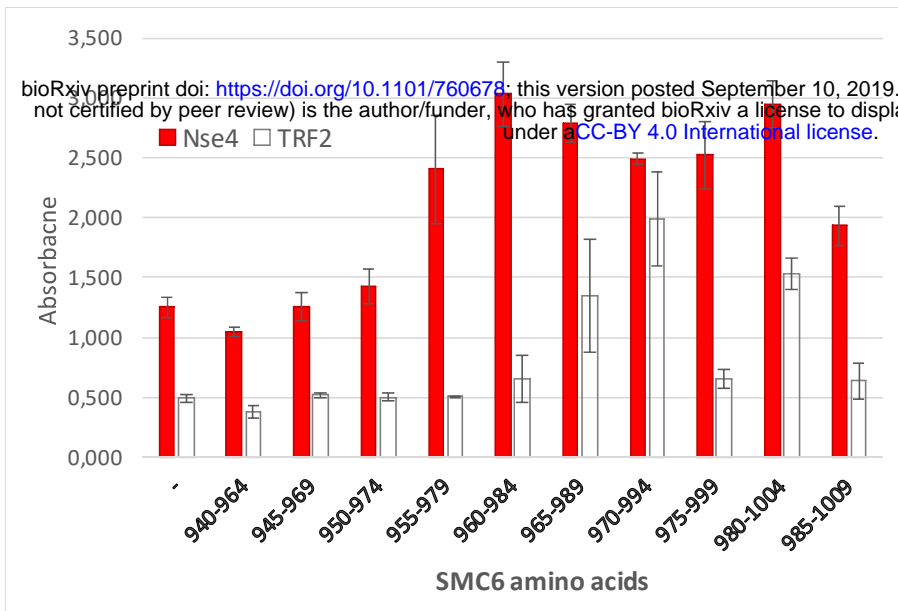**B**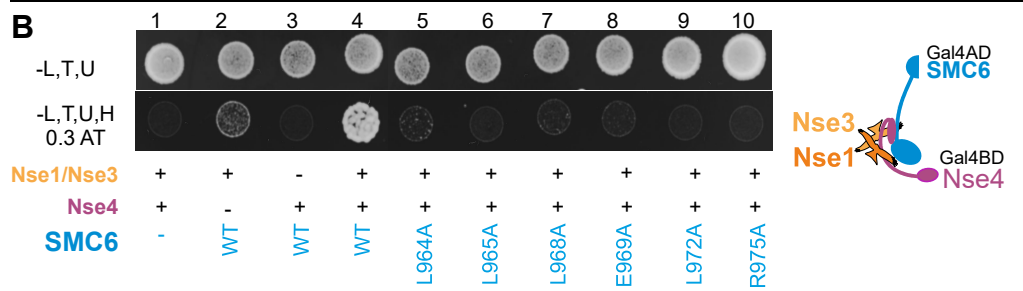**C**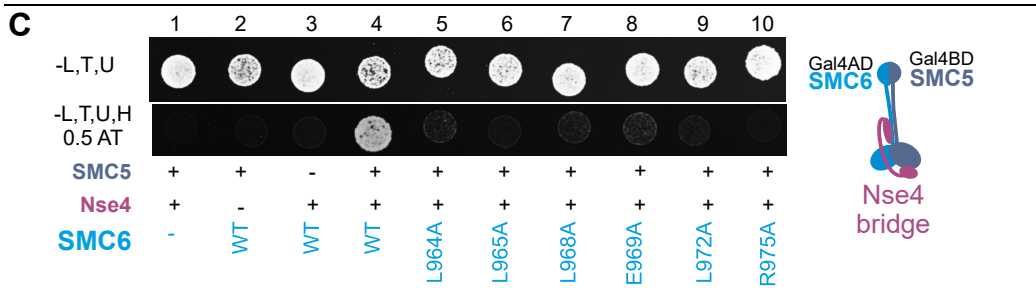**D**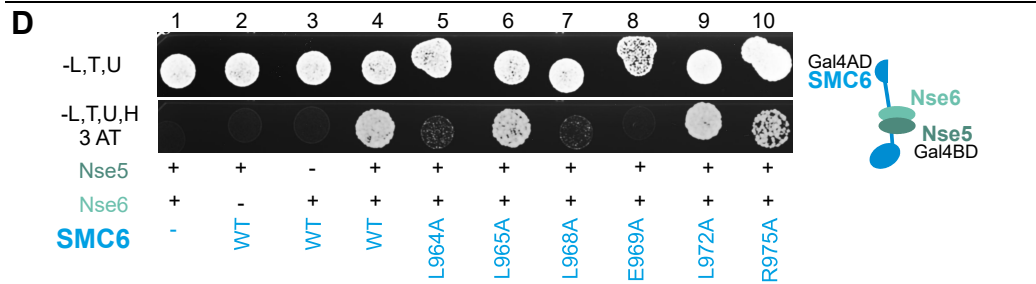

**A**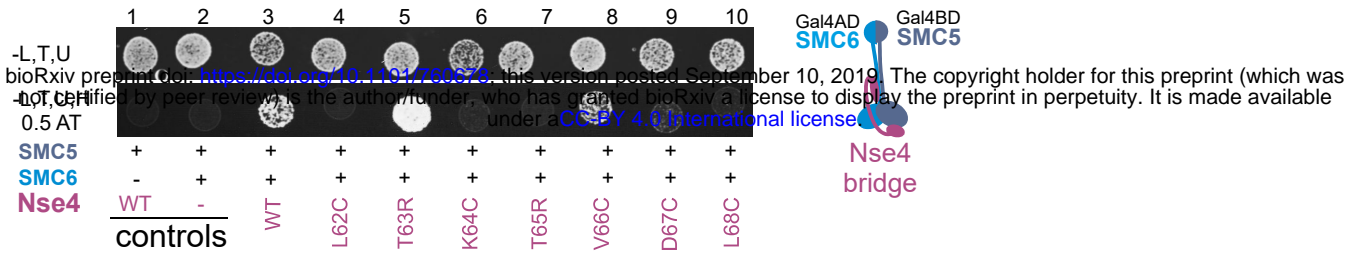**B**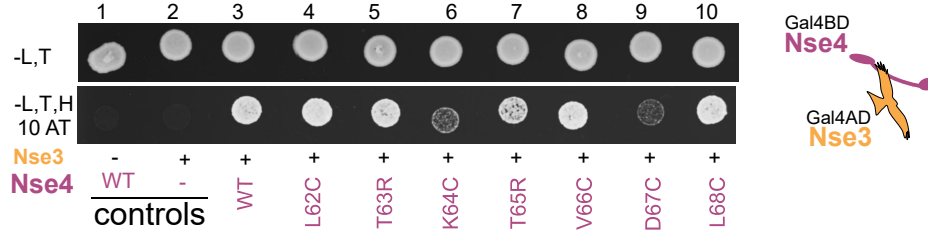**C**

|           |     |        |       |        |        |        |      |  |  |  |  |
|-----------|-----|--------|-------|--------|--------|--------|------|--|--|--|--|
| mutations |     |        |       | 62     | 65     | 68     |      |  |  |  |  |
| S.p.      | 52  | PTEATL | DALL  | LLTKTV | DLASIK | KAROL  | HLHI |  |  |  |  |
| A.n.      | 132 | TSDATI | DSRLL | VNAADL | SYKKA  | ATLAL  |      |  |  |  |  |
| A.c.      | 139 | TSDATI | DSRLL | VTAADL | GHKKT  | AOLVL  |      |  |  |  |  |
| D.r.      | 103 | AREAA  | DAQLL | VLATD  | LGKEK  | ASOLHA |      |  |  |  |  |
| X.l.      | 80  | AREAA  | DAQLL | VLASS  | LGKEK  | ASOLHA |      |  |  |  |  |
| O.a.      | 130 | AREAA  | DAQFL | VLASD  | LGKEK  | ANOLRS |      |  |  |  |  |
| M.d.      | 120 | AREAA  | DAQFL | VLASD  | LGKEK  | ANOLHS |      |  |  |  |  |
| L.a.A     | 131 | AREAV  | DAHFL | VLASD  | LGKEK  | AKOLRS |      |  |  |  |  |
| L.a.B     | 120 | TREAA  | DAQFL | VMAAD  | LGKEK  | SROLRS |      |  |  |  |  |
| D.n.A     | 127 | AREAV  | DAHFL | VLASD  | LGKEK  | AKOLRS |      |  |  |  |  |
| D.n.B     | 120 | TREAA  | DAQFL | VLASD  | LGKEK  | VKOLNS |      |  |  |  |  |
| M.m.A     | 124 | AREAV  | DAQFL | VLASD  | LGKEK  | AKOLRS |      |  |  |  |  |
| M.m.B     | 126 | TREAA  | DAQFL | VLASD  | LGKEK  | AKOLNT |      |  |  |  |  |
| H.s.A     | 127 | AREAV  | DAHFL | VLASD  | LGKEK  | AKOLRS |      |  |  |  |  |
| H.s.B     | 83  | TREAA  | DARFL | VMAAD  | LGKEK  | AKOLNS |      |  |  |  |  |

**D**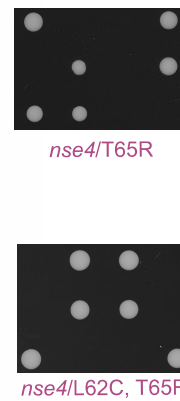

**A**

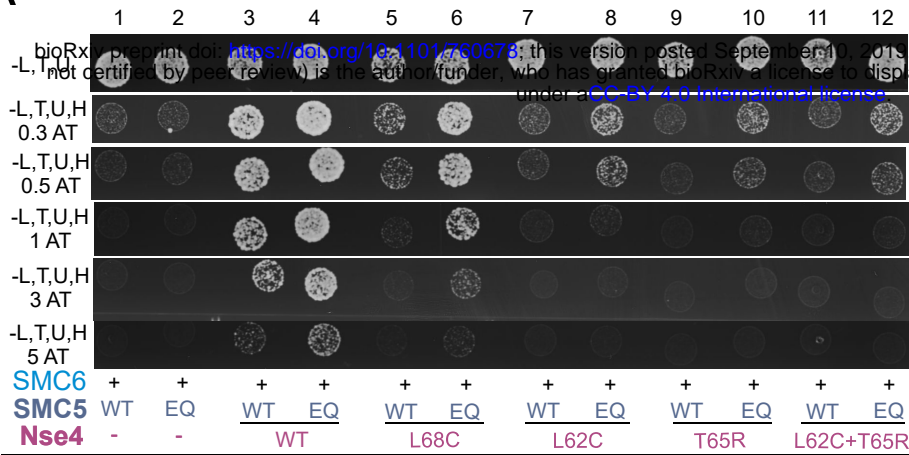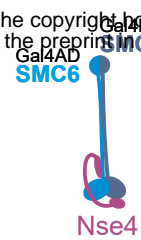

**B**

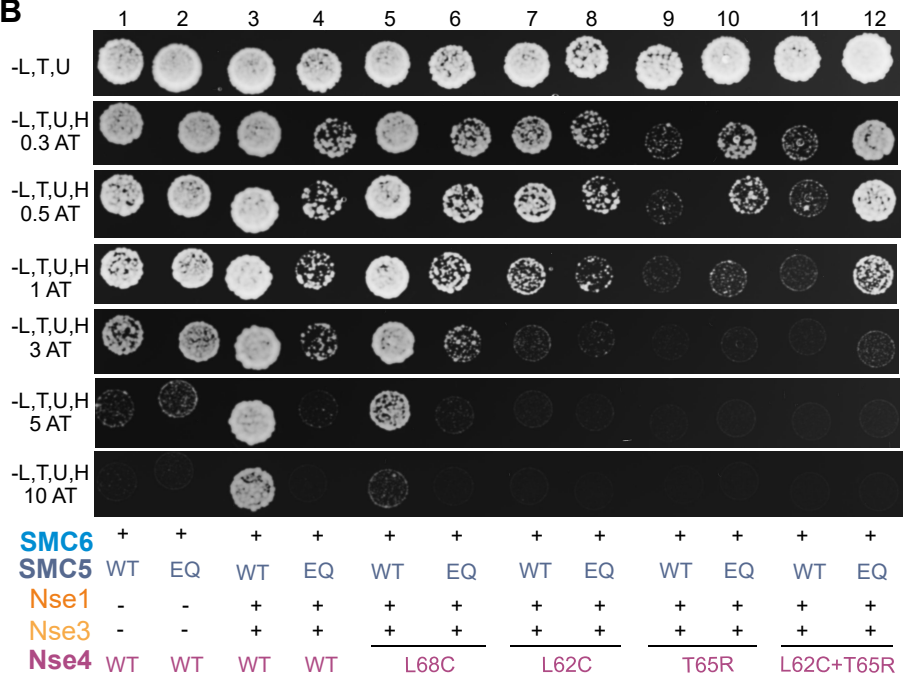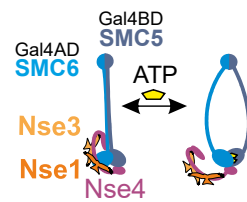

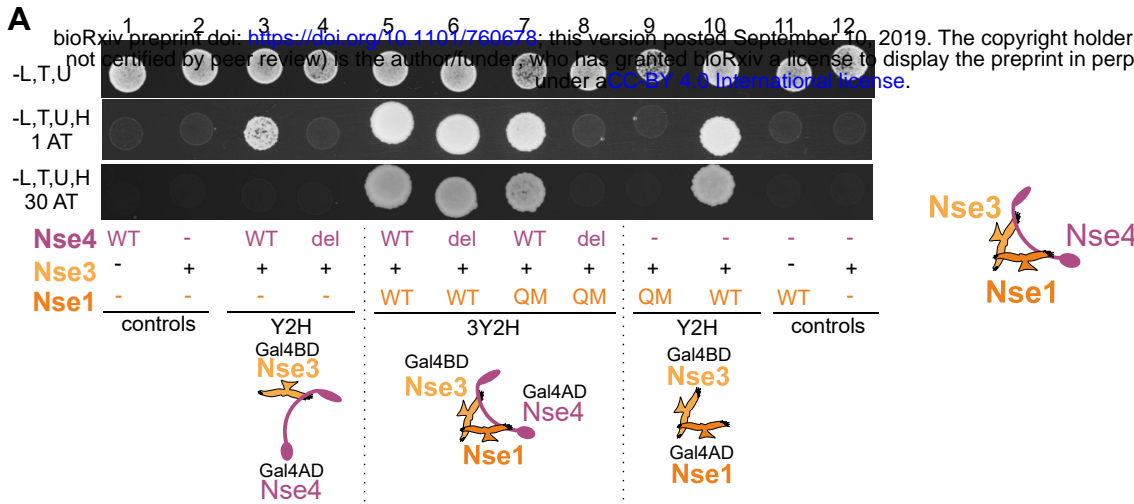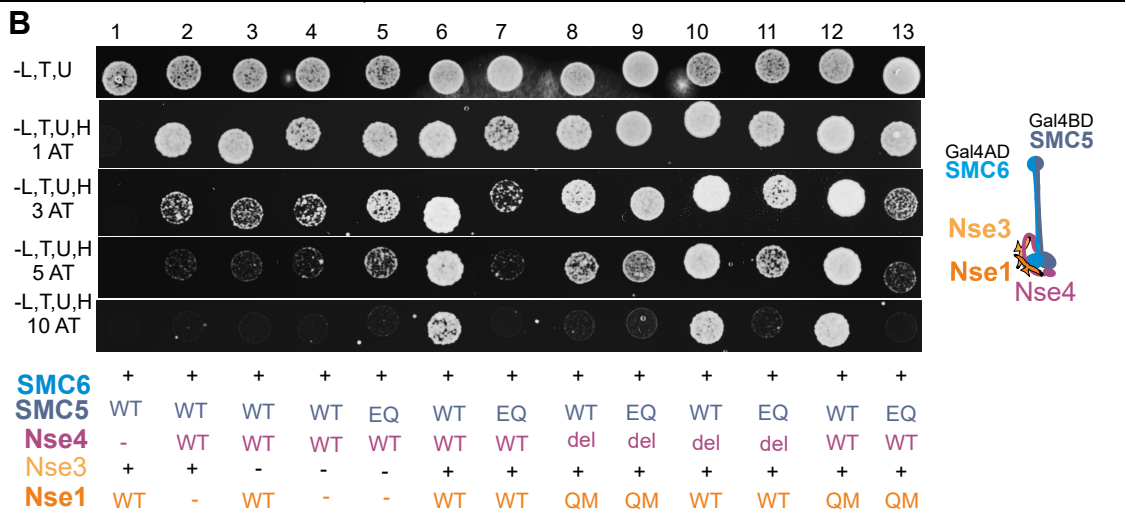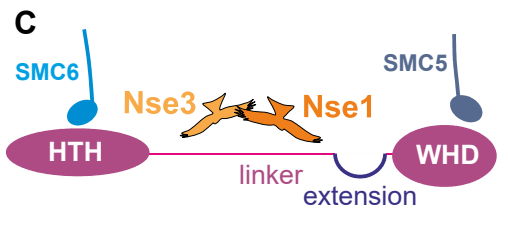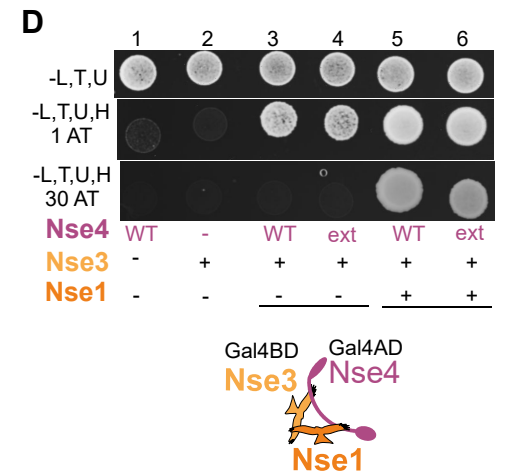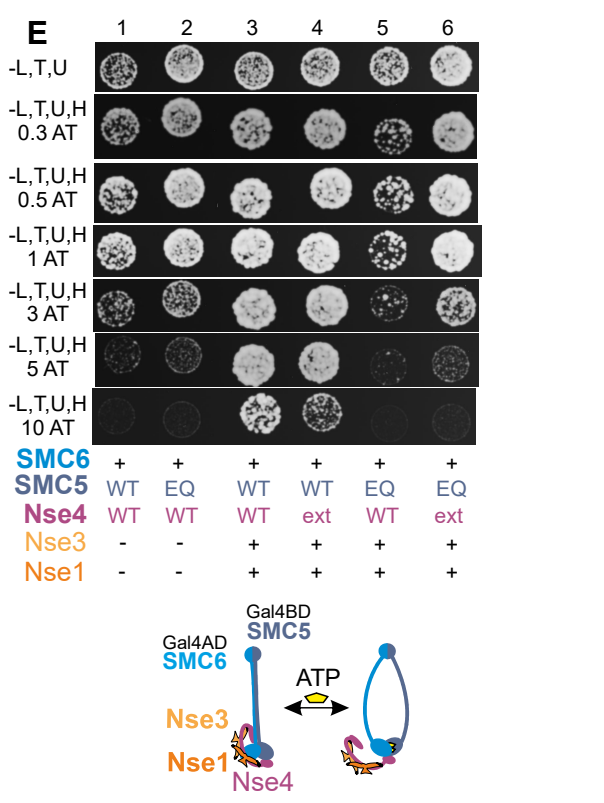

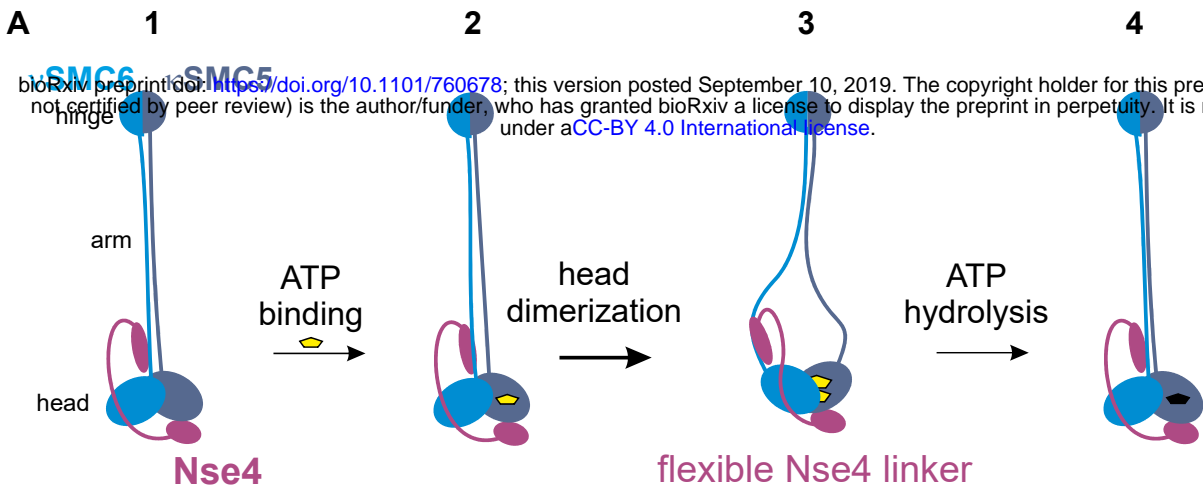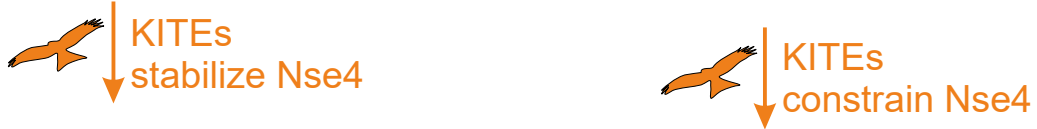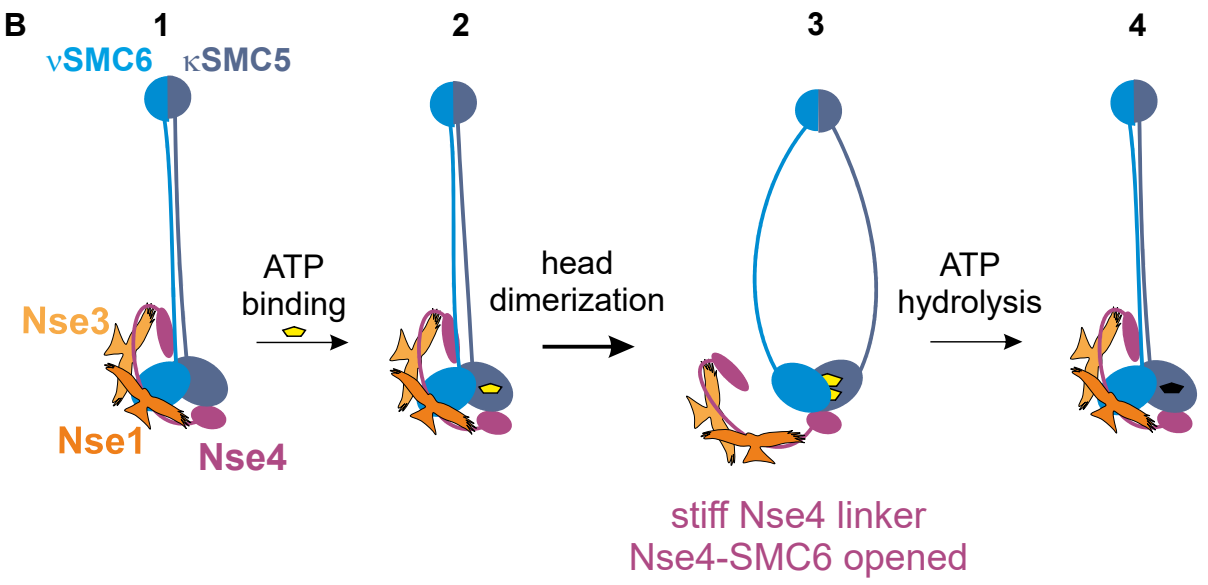

Source: https://www.biorxiv.org/content/10.1101/760678v2.full.pdf
