# Supplementary material for: A role of the Nse4 kleisin and Nse1/Nse3 KITE subunits in the ATPase cycle of SMC5/6
Source: bioRxiv or medRxiv preprint supplement (doi:10.1101/760678), 2019-09-10
Supplement: Supplementary file [file media-1.pdf]

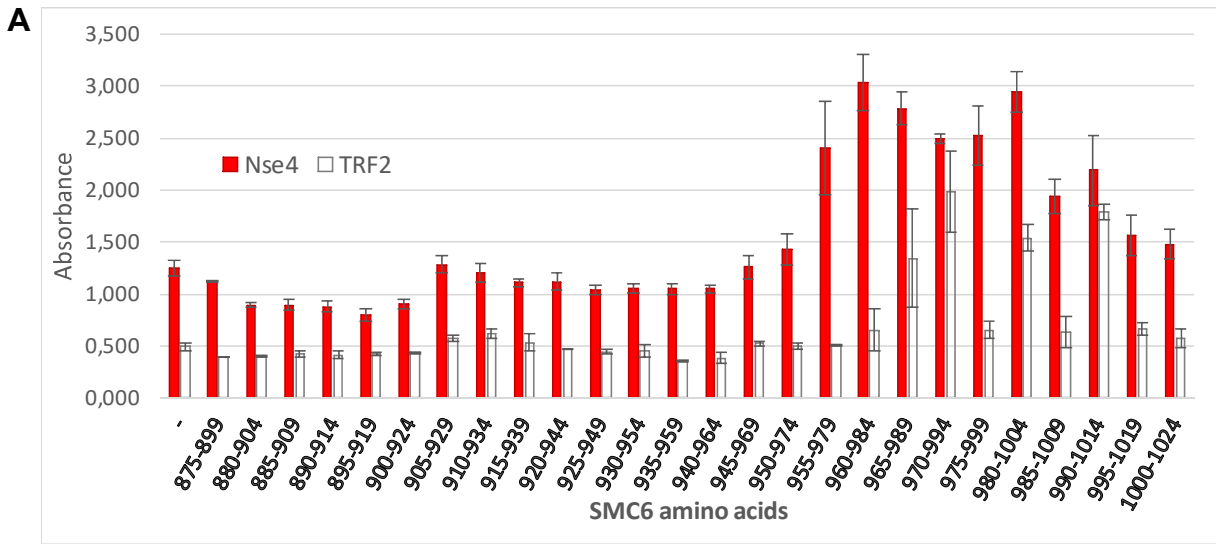

**B**

mutations

|      |      |                                                 |      |
|------|------|-------------------------------------------------|------|
| S.p. | 955  | KVLVARELTQLLQALEETLRRRNEMWTKFRKLIHLRTKELFELYLSQ | 1000 |
| A.n. | 970  | LKQVEEFGLLLEVLKASLNHRKERWRAFRSHISSRAKAQFTYLLSE  | 1015 |
| A.c. | 962  | LKQIEEFRLADVLKATLKHRKHRWQIFRSHISSRAKAQFTYLLSE   | 1007 |
| S.c. | 940  | QKKYMEIDEALNRLHNSLKARDQNYKNAEKGTQFDADMDFRASLKV  | 985  |
| D.r. | 911  | SRQVKGLDFAFIHQLSKIMTTRHNVAEMRMYLSVRCKYNFHSMLSQ  | 956  |
| X.l. | 944  | EGKVKHLKRFIKLLDEIMAQRYKSYQQFRRCLEFRCKIYFDSLISQ  | 989  |
| O.a. | 913  | EGKVKNLKRFIKLLDEIMTQRYKTYQQFRRCLELRCKFYFDSLIAQ  | 958  |
| L.a. | 909  | ENKVKTLKKFIKLLLEEIMTHRYKTYQQFRRCLELRCKLYFDNLLSQ | 954  |
| M.d. | 1094 | DSKVKSLKKFIKLLLEKIMAQRYSTYQQFRRCLELRCKLYFDNLLSQ | 1139 |
| D.n. | 886  | DNKVRTLKRFIKLLLEEIMTHRYKTYQQFRRCLELRCKLYFDNLLSQ | 931  |
| M.m. | 912  | DNKVRTLRRFIKLLLEEIMTHRYKTYQQFRRCLELRCKLYFDNLLSQ | 957  |
| H.s. | 906  | DSKVRTLKKFIKLLGEIMEHRFKTYQQFRRCLELRCKLYFDNLLSQ  | 951  |

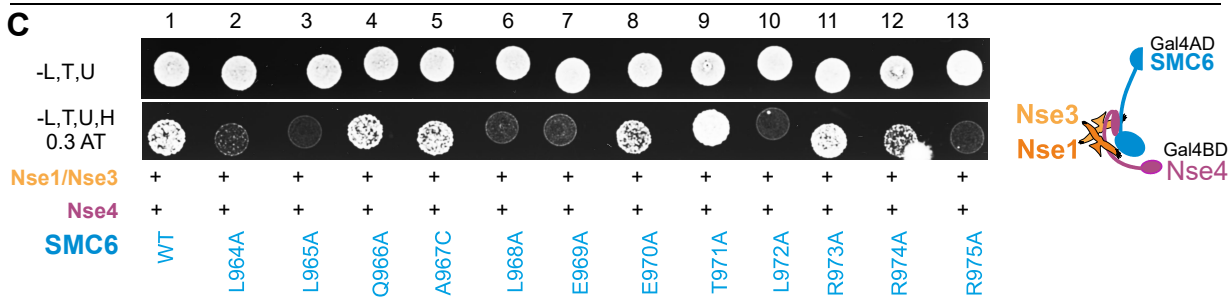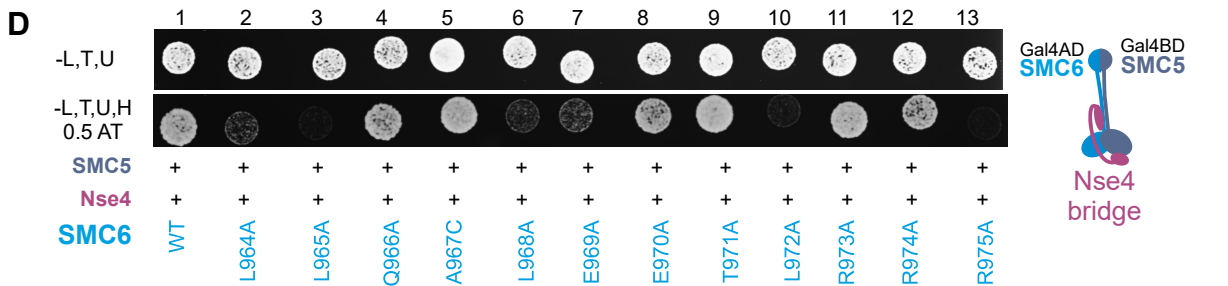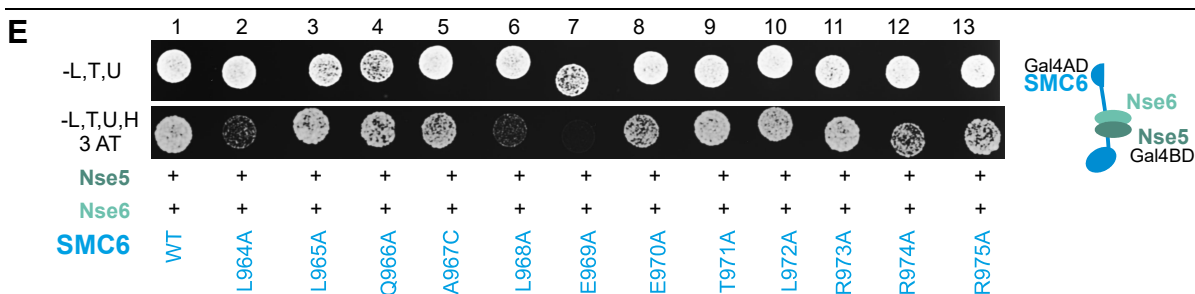

**A**

spSMC5/K57I

|      |      |     |      |      |      |      |       |      |     |
|------|------|-----|------|------|------|------|-------|------|-----|
| Smc  | B.s. | 27  | TAVV | GGP  | NGS  | SGKS | NI    | TDAI | 45  |
| Smc1 | S.p. | 28  | TSI  | IGP  | NGAG | KSN  | LM    | DAI  | 46  |
| Smc2 | S.p. | 28  | NAIT | GLNG | SGKS | NI   | LDAI  | 46   |     |
| Smc3 | S.p. | 28  | NVIV | GRNG | SGKS | NF   | FAAI  | 46   |     |
| Smc4 | S.p. | 151 | SSI  | VGP  | NGS  | SGKS | NV    | IDAL | 169 |
| Smc5 | S.p. | 47  | NLI  | IGP  | NGT  | GKST | IV    | SAI  | 65  |
| Smc6 | S.p. | 120 | NFVI | GHNG | SGKS | AI   | LTGL  | 138  |     |
| Smc1 | H.s. | 28  | TAI  | IGP  | NGS  | KSN  | LM    | DAI  | 46  |
| Smc2 | H.s. | 28  | NAIT | GLNG | SGKS | NI   | LDSI  | 46   |     |
| Smc3 | H.s. | 28  | NVIV | GRNG | SGKS | NF   | FYAI  | 46   |     |
| Smc4 | H.s. | 109 | SCI  | IGP  | NGS  | KSN  | VIDSM | 127  |     |
| Smc5 | H.s. | 76  | NMIV | GANG | TGKS | SI   | VCAI  | 94   |     |
| Smc6 | H.s. | 72  | NFVV | GNNG | SGKS | AV   | LTAL  | 90   |     |

: \* \*\* .\*\*\* :

**B**

|      |      |      |               |       |              |      |      |     |      |     |     |     |     |      |      |         |      |    |   |   |   |   |   |   |   |   |   |   |   |      |      |   |   |      |      |      |      |
|------|------|------|---------------|-------|--------------|------|------|-----|------|-----|-----|-----|-----|------|------|---------|------|----|---|---|---|---|---|---|---|---|---|---|---|------|------|---|---|------|------|------|------|
|      |      |      | spSMC6/S1045R |       | spSMC5/E995Q |      |      |     |      |     |     |     |     |      |      |         |      |    |   |   |   |   |   |   |   |   |   |   |   |      |      |   |   |      |      |      |      |
| Smc  | B.s. | 1087 | LL            | SGGER | ALTA         | IALL | FS   | ILK | VRPV | PF  | CVL | DE  | VEA | ALDE | 1125 |         |      |    |   |   |   |   |   |   |   |   |   |   |   |      |      |   |   |      |      |      |      |
| Smc1 | S.p. | 1130 | QL            | SGG   | EKTMA        | ALAL | LF   | AI  | HSY  | QPS | PF  | FVL | DE  | IDA  | ALDQ | 1168    |      |    |   |   |   |   |   |   |   |   |   |   |   |      |      |   |   |      |      |      |      |
| Smc2 | S.p. | 1084 | EL            | SGG   | QRS          | LVAL | LIMS | LL  | KYK  | PAP | MY  | IL  | DE  | IDA  | ALDL | 1122    |      |    |   |   |   |   |   |   |   |   |   |   |   |      |      |   |   |      |      |      |      |
| Smc3 | S.p. | 1095 | QL            | SGG   | QKSL         | CALT | LI   | F   | AI   | QR  | CD  | PAP | F   | NI   | LDE  | CDANLDA | 1133 |    |   |   |   |   |   |   |   |   |   |   |   |      |      |   |   |      |      |      |      |
| Smc4 | S.p. | 1228 | NL            | SGG   | EKTL         | S    | SL   | AL  | V    | F   | AL  | H   | NY  | K    | P    | T       | PL   | Y  | V | M | D | E | I | D | A | A | L | D | F | 1266 |      |   |   |      |      |      |      |
| Smc5 | S.p. | 964  | RQ            | SGG   | ERS          | V    | ST   | I   | M    | Y   | L   | L   | S   | L    | Q    | G       | L    | A  | I | A | P | F | R | I | V | D | E | I | N | Q    | G    | M | D | P    | 1002 |      |      |
| Smc6 | S.p. | 1042 | GL            | SGG   | EKS          | F    | A    | T   | I    | C   | M   | L   | L   | S    | I    | W       | E    | A  | M | S | C | P | L | R | C | L | D | E | F | D    | V    | F | M | D    | A    | 1080 |      |
| Smc1 | H.s. | 1126 | NL            | SGG   | EKT          | V    | A    | A   | L    | A   | L   | I   | F   | A    | I    | H       | S    | Y  | K | P | A | P | P | F | F | V | L | D | E | I    | D    | A | A | L    | D    | N    | 1164 |
| Smc2 | H.s. | 1083 | EL            | SGG   | QRS          | L    | V    | A   | L    | S   | L   | I   | L   | S    | M    | L       | L    | F  | K | P | A | P | I | Y | I | L | D | E | V | D    | A    | A | L | D    | L    | 1121 |      |
| Smc3 | H.s. | 1113 | QL            | SGG   | QKSL         | V    | A    | L   | A    | L   | I   | F   | A   | I    | Q    | K       | C    | D  | P | A | P | F | Y | L | F | D | E | I | D | Q    | A    | L | D | A    | 1151 |      |      |
| Smc4 | H.s. | 1189 | NL            | SGG   | EKTL         | S    | SL   | AL  | V    | F   | AL  | H   | H   | Y    | K    | P       | T    | PL | Y | F | M | D | E | I | D | A | A | L | D | F    | 1227 |   |   |      |      |      |      |
| Smc5 | H.s. | 989  | HQ            | SGG   | ERS          | V    | ST   | M   | L    | Y   | L   | M   | A   | L    | Q    | E       | L    | N  | R | C | P | F | R | V | D | E | I | N | Q | G    | M    | D | P | 1027 |      |      |      |
| Smc6 | H.s. | 985  | AL            | SGG   | ERS          | F    | S    | T   | V    | C   | F   | I   | L   | S    | L    | W       | S    | I  | A | E | S | P | F | R | C | L | D | E | F | D    | V    | Y | M | D    | M    | 1023 |      |

\*\*\*: : : : : \* : .\*\* : \*

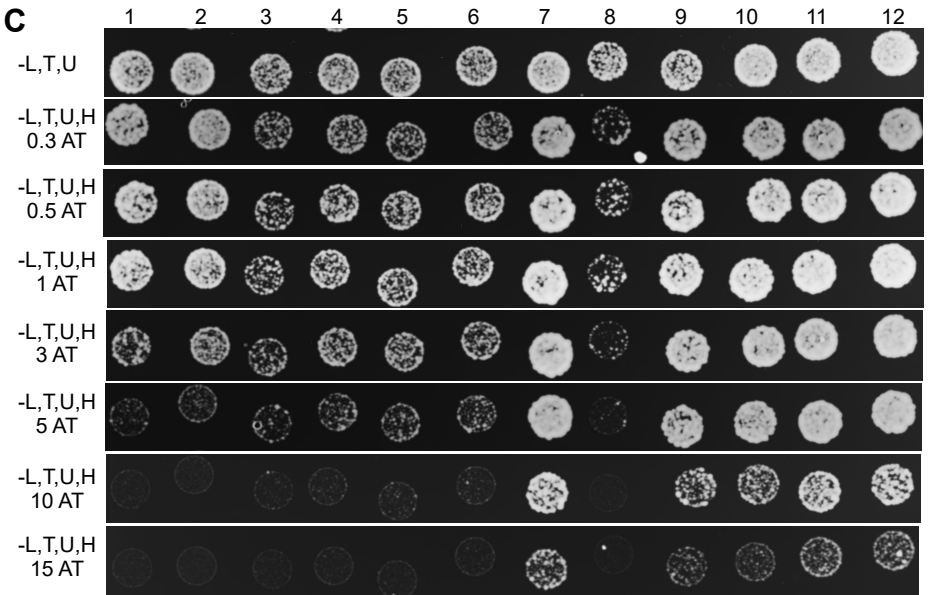

|             |    |    |    |    |    |       |    |    |    |    |    |       |
|-------------|----|----|----|----|----|-------|----|----|----|----|----|-------|
| <b>SMC6</b> | WT | WT | SR | SR | WT | WT    | WT | WT | SR | SR | WT | WT    |
| <b>SMC5</b> | WT | EQ | WT | EQ | KI | KI+EQ | WT | EQ | WT | EQ | KI | KI+EQ |
| <b>Nse1</b> | -  | -  | -  | -  | -  | -     | +  | +  | +  | +  | +  | +     |
| <b>Nse3</b> | -  | -  | -  | -  | -  | -     | +  | +  | +  | +  | +  | +     |
| <b>Nse4</b> | +  | +  | +  | +  | +  | +     | +  | +  | +  | +  | +  | +     |

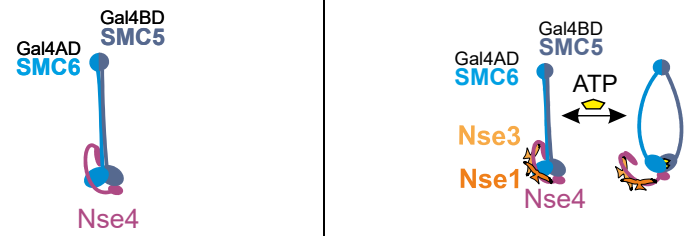

**Supplementary Table 1: SMC6(aa875-1024) peptide library**

| aa        | Smc6 peptide sequence      |
|-----------|----------------------------|
| 875-899   | TNILREKEAKKVQCAQVVADYTAKA  |
| 880-904   | EKEAKKVQCAQVVADYTAKANTRCE  |
| 885-909   | KVQCAQVVADYTAKANTRCERVPVQ  |
| 890-914   | QVVADYTAKANTRCERVPVQLSPAEL |
| 895-919   | YTAKANTRCERVPVQLSPAELDNEI  |
| 900-924   | NTRCERVPVQLSPAELDNEIERLQM  |
| 905-929   | RVPVQLSPAELDNEIERLQMQIAEW  |
| 910-934   | LSPAELDNEIERLQMQIAEWRNRTG  |
| 915-939   | LDNEIERLQMQIAEWRNRTGVSVEQ  |
| 920-944   | ERLQMQIAEWRNRTGVSVEQAAEDY  |
| 925-949   | QIAEWRNRTGVSVEQAAEDYLNAKE  |
| 930-954   | RNRTGVSVEQAAEDYLNAKEKHDQA  |
| 935-959   | VSVEQAAEDYLNAKEKHDQAKVLVA  |
| 940-964   | AAEDYLNAKEKHDQAKVLVARLTQL  |
| 945-969   | LNAKEKHDQAKVLVARLTQLLQALE  |
| 950-974   | KHDQAKVLVARLTQLLQALEETLRR  |
| 955-979   | KVLVARLTQLLQALEETLRRRNEMW  |
| 960-984   | RLTQLLQALEETLRRRNEMWTKFRK  |
| 965-989   | LQALEETLRRRNEMWTKFRKLITLR  |
| 970-994   | ETLRRRNEMWTKFRKLITLRTKELF  |
| 975-999   | RNEMWTKFRKLITLRTKELFELYLS  |
| 980-1004  | TKFRKLITLRTKELFELYLSQRNFT  |
| 985-1009  | LITLRTKELFELYLSQRNFTGKLVI  |
| 990-1014  | TKELFELYLSQRNFTGKLVIKHQEE  |
| 995-1019  | ELYLSQRNFTGKLVIKHQEEFLEPR  |
| 1000-1024 | QRNFTGKLVIKHQEEFLEPRVYPAN  |

**Supplementary Table 2: Primers used for PCR**

|                                                  |        |     |                                           |
|--------------------------------------------------|--------|-----|-------------------------------------------|
| SMC5 In-Fusion pGBKT7                            | oLV511 | fw  | CTGCATATGGCCATGGATGGCCTTAGGCCT            |
|                                                  | oLV486 | rev | GCCGCTGCAGGTCGACTTATGACGAAGAAATGAGTGC     |
| Nse6 In-Fusion p416ADH1                          | EB77   | fw  | CCGCTCTAGAAGTAGTATGAATGCGTCTAATAACATTTCAA |
|                                                  | EB78   | rev | ATGACTCGAGGTCGACTTATCTTTTGTACGCTTGCC      |
| Nse4 In-Fusion pGADT7                            | oLV575 | fw  | CAGATTACGCTCATATGTCCTCCATTGATAAACG        |
|                                                  | oLV576 | rev | CGAGCTCGATGGATCCTCAGCCATACCAAGTATTACTGT   |
| insertion into p416ADH1                          | KB353  | fw  | CTTTAATTTGCGGCCGGGAGCTCGCCGGGATC          |
|                                                  | KB354  | rev | CTATAGGGCGAATTGG                          |
| (G <sub>4</sub> S) <sub>6</sub> linker insertion | oLV579 | fw  | CATTACTACCGTCGAaGGTGGAGGAGGCTCT           |
|                                                  | oLV580 | rev | TATTTTCTTGGTCGACTGACCCTCCGCCT             |
| 3'end of Nse4                                    | JP414  | fw  | CTCGAGATAACGCTTCGTAATTAAGAT               |
|                                                  | JP415  | rev | GTCGACCTTGCATAAATACTTAGTCC                |
| Nse4 In-Fusion pGEM                              | oLV680 | fw  | TAGAACTAGTGGATCCATGTCCTCCATTGATAAACG      |
|                                                  | oLV681 | rev | GCTTGATATCGAATTCTCAGCCATACCAAGTATTACT     |

**Supplementary Table 3: Primers used for site-directed mutagenesis**

|                          |        |     |                                                           |
|--------------------------|--------|-----|-----------------------------------------------------------|
| SalI mutation in MCS     | oLV522 | fw  | TCAAGCTTATCGATACCGTgGACCTCGAGTCATGTAATTAGT                |
|                          | oLV523 | rev | ACTAATTACATGACTCGAGGTCcACGGTATCGATAAGCTTGA                |
| SalI insertion into Nse4 | oLV520 | fw  | CTGAATGAACGTAACATTACTACCgtcgacCAAGAAAATAACACCACTAAAAATG   |
|                          | oLV521 | rev | CATTTTTAGTGGTGTATTTTTCTTGtgcgacGGTAGTAATGTTACGTTTCATTTCAG |
| Nse1 Q18A M21A           | JP891  | fw  | GACAAGCATAAATTCATTCTTgcATATATAgcGTGTCGCACAGCTGGTGTGG      |
|                          | JP892  | rev | CAACACCAGCTGTGCGACACgcTATATATgcAAGAATGAATTTATGCTTGTC      |
| Nse4 L62C                | oLV291 | fw  | GAAGCAACCTTAGATGCTTTACTGtgTACTAAAACGGTTGATCTGGCTTC        |
|                          | oLV292 | rev | GAAGCCAGATCAACCGTTTTAGTAcacAGTAAAGCATCTAAGGTTGCTTC        |
| Nse4 T63R                | oLV612 | fw  | AACCTTAGATGCTTTACTGCTTAgaAAAACGGTTGATCTGGCT               |
|                          | oLV613 | rev | AGCCAGATCAACCGTTTTtcTAAGCAGTAAAGCATCTAAGGTT               |
| Nse4 K64C                | oLV295 | fw  | GCAACCTTAGATGCTTTACTGCTTACTtgcACGGTTGATCTGGCTTCCA         |
|                          | oLV296 | rev | TGGAAGCCAGATCAACCGTgcaAGTAAGCAGTAAAGCATCTAAGGTTGC         |
| Nse4 T65R                | oLV614 | fw  | AGATGCTTTACTGCTTACTAAAAGGGTTGATCTGGCTTCCA                 |
|                          | oLV615 | rev | TGGAAGCCAGATCAACCCTTTTAGTAAGCAGTAAAGCATCT                 |
| Nse4 V66C                | oLV417 | fw  | GATGCTTTACTGCTTACTAAAACGtgTGATCTGGCTTCCATTAAAGC           |
|                          | oLV418 | rev | GCTTTAATGGAAGCCAGATCAcAcCGTTTTAGTAAGCAGTAAAGCATC          |
| Nse4 D67C                | oLV297 | fw  | ATGCTTTACTGCTTACTAAAACGGTTtgTCTGGCTTCCATTAAAGCTAGG        |
|                          | oLV298 | rev | CCTAGCTTTAATGGAAGCCAGAcAaAACCCTTTTAGTAAGCAGTAAAGCAT       |
| Nse4 L68C                | oLV377 | fw  | ACTGCTTACTAAAACGGTTGATtgcGCTTCCATTAAAGCTAGGCA             |
|                          | oLV378 | rev | TGCCTAGCTTTAATGGAAGCgcaATCAACCGTTTTAGTAAGCAGT             |
| Nse4 L62C T65R           | oLV676 | fw  | AGCAACCTTAGATGCTTTACTGtgTACTAAAAGGGTTGATCTGGCTTCCA        |
|                          | oLV677 | rev | TGGAAGCCAGATCAACCCTTTTAGTAcacAGTAAAGCATCTAAGGTTGCT        |
| Nse4 del187-91           | oLV654 | fw  | TTGGAAGGCCCAAGTTTAATATTGAAATTAAGCAATTCCTCAACTATCC         |
|                          | oLV655 | rev | GGATAGTTGAGGAATTGCTTAATTTCAATATTAAACTTGGGCCTTCCAA         |
| Smc5 E995Q               | oLV494 | fw  | GCTCCGTTTCGAATAGTTGATcAAATAAATCAAGGAATGGATCCTC            |
|                          | oLV495 | rev | GAGGATCCATTCCCTTGATTTATTTgATCAACTATTCGAAACGGAGC           |
| Smc5 K57I                | oLV674 | fw  | TTTGATTATCGGTCCAAATGGGACAGGTAtaAGCACAATTGTTTCAG           |
|                          | oLV675 | rev | CTGAAACAATTGTGCTtaTACCTGTCCATTTGGACCGATAATCAAA            |

|             |        |     |                                                |
|-------------|--------|-----|------------------------------------------------|
| Smc6 L964A  | oLV179 | fw  | GCTAGACTCACGCAAgcATTGCAAGCTTTAGAAGA            |
|             | oLV180 | rev | TCTTCTAAAGCTTGCAATgcTTGCGTGAGTCTAGC            |
| Smc6 L965A  | oLV550 | fw  | TGCTAGACTCACGCAACTAgcGCAAGCTTTAGAAGAGACGT      |
|             | oLV551 | rev | ACGTCTCTTCTAAAGCTTGCgcTAGTTGCGTGAGTCTAGCA      |
| Smc6 Q966A  | oLV552 | fw  | CTAGACTCACGCAACTATTGgcAGCTTTAGAAGAGACGTTAC     |
|             | oLV553 | rev | GTAACGTCTCTTCTAAAGCTgcCAATAGTTGCGTGAGTCTAG     |
| Smc6 A967C  | oLV315 | fw  | AGACTCACGCAACTATTGCAAtgTTTAGAAGAGACGTTACGAAGGC |
|             | oLV316 | rev | GCCTTCGTAACGTCTCTTCTAAAcATTGCAATAGTTGCGTGAGTCT |
| Smc6 L968A  | oLV183 | fw  | GCAACTATTGCAAGCTgcAGAAGAGACGTTACGAAG           |
|             | oLV184 | rev | CTTCGTAACGTCTCTTCTgcAGCTTGCAATAGTTGC           |
| Smc6 E969A  | oLV554 | fw  | ACGCAACTATTGCAAGCTTTAgcAGAGACGTTACGAAGGCGT     |
|             | oLV555 | rev | ACGCCTTCGTAACGTCTCTgcTAAAGCTTGCAATAGTTGCGT     |
| Smc6 E970A  | oLV187 | fw  | CTATTGCAAGCTTTAGAAGcGACGTTACGAAGGCGT           |
|             | oLV188 | rev | ACGCCTTCGTAACGTCgCTTCTAAAGCTTGCAATAG           |
| Smc6 T971A  | oLV556 | fw  | ACTATTGCAAGCTTTAGAAGAgCGTTACGAAGGCGTAATG       |
|             | oLV557 | rev | CATTACGCCTTCGTAACGcCTCTTCTAAAGCTTGCAATAGT      |
| Smc6 L972A  | oLV558 | fw  | TGCAAGCTTTAGAAGAGACGgcACGAAGGCGTAATGAAATGT     |
|             | oLV559 | rev | ACATTTTCATTACGCCTTCGTgcCGTCTCTTCTAAAGCTTGCA    |
| Smc6 R973A  | oLV189 | fw  | GCTTTAGAAGAGACGTTAgcAAGGCGTAATGAAATGTG         |
|             | oLV190 | rev | CACATTTTCATTACGCCTTgcTAACGTCTCTTCTAAAGC        |
| Smc6 R974A  | oLV191 | fw  | CTTTAGAAGAGACGTTACGAgcGCGTAATGAAATGTGGAC       |
|             | oLV192 | rev | GTCCACATTTTCATTACGCgcTCGTAACGTCTCTTCTAAAG      |
| Smc6 R975A  | oLV193 | fw  | GAAGAGACGTTACGAAGGgcTAATGAAATGTGGACCAAATTC     |
|             | oLV194 | rev | GAAATTTGGTCCACATTTTCATTAgcCCTTCGTAACGTCTCTTC   |
| Smc6 S1045R | oLV498 | fw  | AAGTCAGCGTTCAAGGATTAcgAGGGGGTGAAAAATCTTTTG     |
|             | oLV499 | rev | CAAAAGATTTTTTACCCCCTcgTAATCCTTGAACGCTGACTT     |
